# Supplementary material for: Systems pharmacology using mass spectrometry identifies critical response nodes in prostate cancer
Source: PubMed Central journal article supplement (PMC6026592; doi:10.1038/s41540-018-0064-1), 2018-07-02
Supplement: 41540_2018_64_MOESM3_ESM.pdf [file 41540_2018_64_MOESM3_ESM.pdf]

**Supplementary Table 1: List of 490 proteins.** A list of proteins of interest in PCa with UniProtID, Symbol, EntrezId and Description.

| Uniprot ID | Entry name  | Protein names                                                 | Official gene name |
|------------|-------------|---------------------------------------------------------------|--------------------|
| O00170     | AIP_HUMAN   | AH receptor-interacting protein                               | AIP                |
| O00763     | ACACB_HUMAN | Acetyl-CoA carboxylase 2                                      | ACACB              |
| O94788     | AL1A2_HUMAN | Retinal dehydrogenase 2                                       | ALDH1A2            |
| P01116     | RASK_HUMAN  | GTPase KRas                                                   | KRAS               |
| P06730     | IF4E_HUMAN  | Eukaryotic translation initiation factor 4E                   | EIF4E              |
| P07288     | KLK3_HUMAN  | Prostate-specific antigen                                     | KLK3               |
| P07900     | HS90A_HUMAN | Heat shock protein HSP 90-alpha                               | HSP90AA1           |
| P07951     | TPM2_HUMAN  | Tropomyosin beta chain                                        | TPM2               |
| P09874     | PARP1_HUMAN | Poly [ADP-ribose] polymerase 1                                | PARP1              |
| P12830     | CADH1_HUMAN | Cadherin-1                                                    | CDH1               |
| P12931     | SRC_HUMAN   | Proto-oncogene tyrosine-protein kinase Src                    | SRC                |
| P16949     | STMN1_HUMAN | Stathmin                                                      | STMN1              |
| P19838     | NFKB1_HUMAN | Nuclear factor NF-kappa-B p105 subunit                        | NFKB1              |
| P20151     | KLK2_HUMAN  | Kallikrein-2                                                  | KLK2               |
| P20700     | LMNB1_HUMAN | Lamin-B1                                                      | LMNB1              |
| P24844     | MYL9_HUMAN  | Myosin regulatory light polypeptide 9                         | MYL9               |
| P26358     | DNMT1_HUMAN | DNA (cytosine-5)-methyltransferase 1                          | DNMT1              |
| P27797     | CALR_HUMAN  | Calreticulin                                                  | CALR               |
| P28482     | MK01_HUMAN  | Mitogen-activated protein kinase 1                            | MAPK1              |
| P30086     | PEBP1_HUMAN | Phosphatidylethanolamine-binding protein 1                    | PEBP1              |
| P31946     | 1433B_HUMAN | 14-3-3 protein beta/alpha                                     | YWHAH              |
| P33991     | MCM4_HUMAN  | DNA replication licensing factor MCM4                         | MCM4               |
| P35221     | CTNA1_HUMAN | Catenin alpha-1                                               | CTNNA1             |
| P35222     | CTNB1_HUMAN | Catenin beta-1                                                | CTNNB1             |
| P35749     | MYH11_HUMAN | Myosin-11                                                     | MYH11              |
| P36507     | MP2K2_HUMAN | Dual specificity mitogen-activated protein kinase kinase 2    | MAP2K2             |
| P40763     | STAT3_HUMAN | Signal transducer and activator of transcription 3            | STAT3              |
| P42224     | STAT1_HUMAN | Signal transducer and activator of transcription 1-alpha/beta | STAT1              |
| P49327     | FAS_HUMAN   | Fatty acid synthase                                           | FASN               |
| P51532     | SMCA4_HUMAN | Transcription activator BRG1                                  | SMARCA4            |
| P60763     | RAC3_HUMAN  | Ras-related C3 botulinum toxin substrate 3                    | RAC3               |
| P60953     | CDC42_HUMAN | Cell division control protein 42 homolog                      | CDC42              |
| P61158     | ARP3_HUMAN  | Actin-related protein 3                                       | ACTR3              |
| P61160     | ARP2_HUMAN  | Actin-related protein 2                                       | ACTR2              |
| P61586     | RHOA_HUMAN  | Transforming protein RhoA                                     | RHOA               |
| P62258     | 1433E_HUMAN | 14-3-3 protein epsilon                                        | YWHAH              |
| P62736     | ACTA_HUMAN  | Actin, aortic smooth muscle                                   | ACTA2              |
| P62826     | RAN_HUMAN   | GTP-binding nuclear protein Ran                               | RAN                |
| P63104     | 1433Z_HUMAN | 14-3-3 protein zeta/delta                                     | YWHAZ              |
| P99999     | CYC_HUMAN   | Cytochrome c                                                  | CYCS               |
| Q02750     | MP2K1_HUMAN | Dual specificity mitogen-activated protein kinase kinase 1    | MAP2K1             |

Supplementary Data: Systems pharmacology using mass spectrometry identifies critical response nodes in prostate cancer by Ebhardt HA, Root A, Liu Y, Gauthier N, Sander C, Aebersold R.

|        |             |                                                   |        |
|--------|-------------|---------------------------------------------------|--------|
| Q06124 | PTN11_HUMAN | Tyrosine-protein phosphatase non-receptor type 11 | PTPN11 |
| Q13085 | ACACA_HUMAN | Acetyl-CoA carboxylase 1                          | ACACA  |
| Q13153 | PAK1_HUMAN  | Serine/threonine-protein kinase PAK 1             | PAK1   |
| Q13451 | FKBP5_HUMAN | Peptidyl-prolyl cis-trans isomerase FKBP5         | FKBP5  |
| Q13480 | GAB1_HUMAN  | GRB2-associated-binding protein 1                 | GAB1   |
| Q15392 | DHC24_HUMAN | Delta(24)-sterol reductase                        | DHCR24 |
| Q16543 | CDC37_HUMAN | Hsp90 co-chaperone Cdc37                          | CDC37  |
| Q8N0X7 | SPART_HUMAN | Spartin                                           | SPART  |
| Q96R06 | SPAG5_HUMAN | Sperm-associated antigen 5                        | SPAG5  |
| Q9UK76 | JUPI1_HUMAN | Jupiter microtubule associated homolog 1          | JPT1   |
| Q9UQ80 | PA2G4_HUMAN | Proliferation-associated protein 2G4              | PA2G4  |

**Supplementary Table 2: Pathway enrichment analysis.** All quantified 52 proteins were analysed using REACTOME pathway enrichment analysis tool REACTOME. The enriched pathways are listed together with their respective statistical significance values.

| Pathway identifier | Pathway name                                                     | Entities pValue | Entities FDR |
|--------------------|------------------------------------------------------------------|-----------------|--------------|
| R-HSA-195258       | RHO GTPase Effectors                                             | 5.27E-14        | 3.70E-11     |
| R-HSA-194315       | Signaling by Rho GTPases                                         | 1.78E-12        | 6.24E-10     |
| R-HSA-9006934      | Signaling by Receptor Tyrosine Kinases                           | 1.13E-11        | 2.64E-09     |
| R-HSA-5625740      | RHO GTPases activate PKNs                                        | 4.53E-11        | 7.92E-09     |
| R-HSA-162582       | Signal Transduction                                              | 5.33E-10        | 7.46E-08     |
| R-HSA-6802948      | Signaling by high-kinase activity BRAF mutants                   | 9.01E-10        | 9.67E-08     |
| R-HSA-5663202      | Diseases of signal transduction                                  | 9.67E-10        | 9.67E-08     |
| R-HSA-5674135      | MAP2K and MAPK activation                                        | 1.86E-09        | 1.30E-07     |
| R-HSA-6802946      | Signaling by moderate kinase activity BRAF mutants               | 1.86E-09        | 1.30E-07     |
| R-HSA-6802955      | Paradoxical activation of RAF signaling by kinase inactive BRAF  | 1.86E-09        | 1.30E-07     |
| R-HSA-6802949      | Signaling by RAS mutants                                         | 1.26E-08        | 7.96E-07     |
| R-HSA-422475       | Axon guidance                                                    | 1.41E-08        | 8.17E-07     |
| R-HSA-1643685      | Disease                                                          | 2.12E-08        | 1.13E-06     |
| R-HSA-2682334      | EPH-Ephrin signaling                                             | 2.68E-08        | 1.34E-06     |
| R-HSA-6802952      | Signaling by BRAF and RAF fusions                                | 2.93E-08        | 1.35E-06     |
| R-HSA-4420097      | VEGFA-VEGFR2 Pathway                                             | 4.01E-08        | 1.73E-06     |
| R-HSA-5675221      | Negative regulation of MAPK pathway                              | 7.03E-08        | 2.88E-06     |
| R-HSA-194138       | Signaling by VEGF                                                | 7.88E-08        | 2.99E-06     |
| R-HSA-3928662      | EPHB-mediated forward signaling                                  | 9.34E-08        | 3.36E-06     |
| R-HSA-1433557      | Signaling by SCF-KIT                                             | 1.23E-07        | 4.27E-06     |
| R-HSA-1266738      | Developmental Biology                                            | 1.29E-07        | 4.27E-06     |
| R-HSA-6802957      | Oncogenic MAPK signaling                                         | 1.44E-07        | 4.46E-06     |
| R-HSA-5673000      | RAF activation                                                   | 2.27E-07        | 6.80E-06     |
| R-HSA-1227986      | Signaling by ERBB2                                               | 4.47E-07        | 1.30E-05     |
| R-HSA-449147       | Signaling by Interleukins                                        | 4.75E-07        | 1.33E-05     |
| R-HSA-186763       | Downstream signal transduction                                   | 5.53E-07        | 1.44E-05     |
| R-HSA-445355       | Smooth Muscle Contraction                                        | 1.17E-06        | 2.93E-05     |
| R-HSA-5637810      | Constitutive Signaling by EGFRvIII                               | 1.27E-06        | 2.93E-05     |
| R-HSA-5637812      | Signaling by EGFRvIII in Cancer                                  | 1.27E-06        | 2.93E-05     |
| R-HSA-1059683      | Interleukin-6 signaling                                          | 1.27E-06        | 2.93E-05     |
| R-HSA-5654743      | Signaling by FGFR4                                               | 2.84E-06        | 5.81E-05     |
| R-HSA-5654741      | Signaling by FGFR3                                               | 2.84E-06        | 5.81E-05     |
| R-HSA-5683057      | MAPK family signaling cascades                                   | 2.87E-06        | 5.81E-05     |
| R-HSA-177929       | Signaling by EGFR                                                | 3.18E-06        | 5.81E-05     |
| R-HSA-5637815      | Signaling by Ligand-Responsive EGFR Variants in Cancer           | 3.23E-06        | 5.81E-05     |
| R-HSA-1236382      | Constitutive Signaling by Ligand-Responsive EGFR Cancer Variants | 3.23E-06        | 5.81E-05     |

|               |                                                                |          |          |
|---------------|----------------------------------------------------------------|----------|----------|
| R-HSA-1643713 | Signaling by EGFR in Cancer                                    | 3.23E-06 | 5.81E-05 |
| R-HSA-5627117 | RHO GTPases Activate ROCKs                                     | 3.23E-06 | 5.81E-05 |
| R-HSA-187037  | NGF signalling via TRKA from the plasma membrane               | 3.57E-06 | 6.07E-05 |
| R-HSA-166520  | Signalling by NGF                                              | 3.74E-06 | 6.37E-05 |
| R-HSA-5674499 | Negative feedback regulation of MAPK pathway                   | 4.60E-06 | 7.65E-05 |
| R-HSA-5627123 | RHO GTPases activate PAKs                                      | 4.78E-06 | 7.65E-05 |
| R-HSA-445144  | Signal transduction by L1                                      | 4.78E-06 | 7.65E-05 |
| R-HSA-1280215 | Cytokine Signaling in Immune system                            | 6.12E-06 | 9.18E-05 |
| R-HSA-112409  | RAF-independent MAPK1/3 activation                             | 8.06E-06 | 1.21E-04 |
| R-HSA-5654736 | Signaling by FGFR1                                             | 8.69E-06 | 1.30E-04 |
| R-HSA-163765  | ChREBP activates metabolic gene expression                     | 1.08E-05 | 1.52E-04 |
| R-HSA-447115  | Interleukin-12 family signaling                                | 1.23E-05 | 1.72E-04 |
| R-HSA-5218920 | VEGFR2 mediated vascular permeability                          | 1.28E-05 | 1.79E-04 |
| R-HSA-168256  | Immune System                                                  | 1.36E-05 | 1.89E-04 |
| R-HSA-186797  | Signaling by PDGF                                              | 1.45E-05 | 1.89E-04 |
| R-HSA-6783589 | Interleukin-6 family signaling                                 | 1.47E-05 | 1.91E-04 |
| R-HSA-3928663 | EPHA-mediated growth cone collapse                             | 1.69E-05 | 2.19E-04 |
| R-HSA-8876493 | InIA-mediated entry of Listeria monocytogenes into host cells  | 2.10E-05 | 2.52E-04 |
| R-HSA-112411  | MAPK1 (ERK2) activation                                        | 2.10E-05 | 2.52E-04 |
| R-HSA-373755  | Semaphorin interactions                                        | 2.14E-05 | 2.57E-04 |
| R-HSA-5626467 | RHO GTPases activate IQGAPs                                    | 2.18E-05 | 2.62E-04 |
| R-HSA-109581  | Apoptosis                                                      | 2.77E-05 | 3.06E-04 |
| R-HSA-180292  | GAB1 signalosome                                               | 2.78E-05 | 3.06E-04 |
| R-HSA-2029480 | Fcγ receptor (FCGR) dependent phagocytosis                     | 3.33E-05 | 3.66E-04 |
| R-HSA-5357801 | Programmed Cell Death                                          | 3.33E-05 | 3.66E-04 |
| R-HSA-5663213 | RHO GTPases Activate WASPs and WAVES                           | 3.90E-05 | 4.29E-04 |
| R-HSA-75035   | Chk1/Chk2(Cds1) mediated inactivation of Cyclin B:Cdk1 complex | 4.56E-05 | 5.02E-04 |
| R-HSA-5654738 | Signaling by FGFR2                                             | 5.12E-05 | 5.12E-04 |
| R-HSA-5684996 | MAPK1/MAPK3 signaling                                          | 5.60E-05 | 5.60E-04 |
| R-HSA-6806834 | Signaling by MET                                               | 5.78E-05 | 5.78E-04 |
| R-HSA-5655302 | Signaling by FGFR1 in disease                                  | 5.85E-05 | 5.85E-04 |
| R-HSA-111447  | Activation of BAD and translocation to mitochondria            | 6.96E-05 | 6.96E-04 |
| R-HSA-109606  | Intrinsic Pathway for Apoptosis                                | 7.72E-05 | 7.57E-04 |
| R-HSA-1295596 | Spry regulation of FGF signaling                               | 8.41E-05 | 7.57E-04 |

Supplementary Data: Systems pharmacology using mass spectrometry identifies critical response nodes in prostate cancer by Ebhardt HA, Root A, Liu Y, Gauthier N, Sander C, Aebersold R.

**Supplementary Table 3: Skyline output of perturbation matrix.** All transitions quantified as function of treatment condition. This table served as input for MSStats.

**Supplementary Table 3 = separate csv file**

**Supplementary Table 4: Copy number alterations for cell lines.** The cBioPortal was queried for DNA copy number alterations of YWHAZ, MYC and NCOA2 of all available cell line models. Prostate cancer models are highlighted with yellow background.

**Supplementary Table 4 = separate csv file**

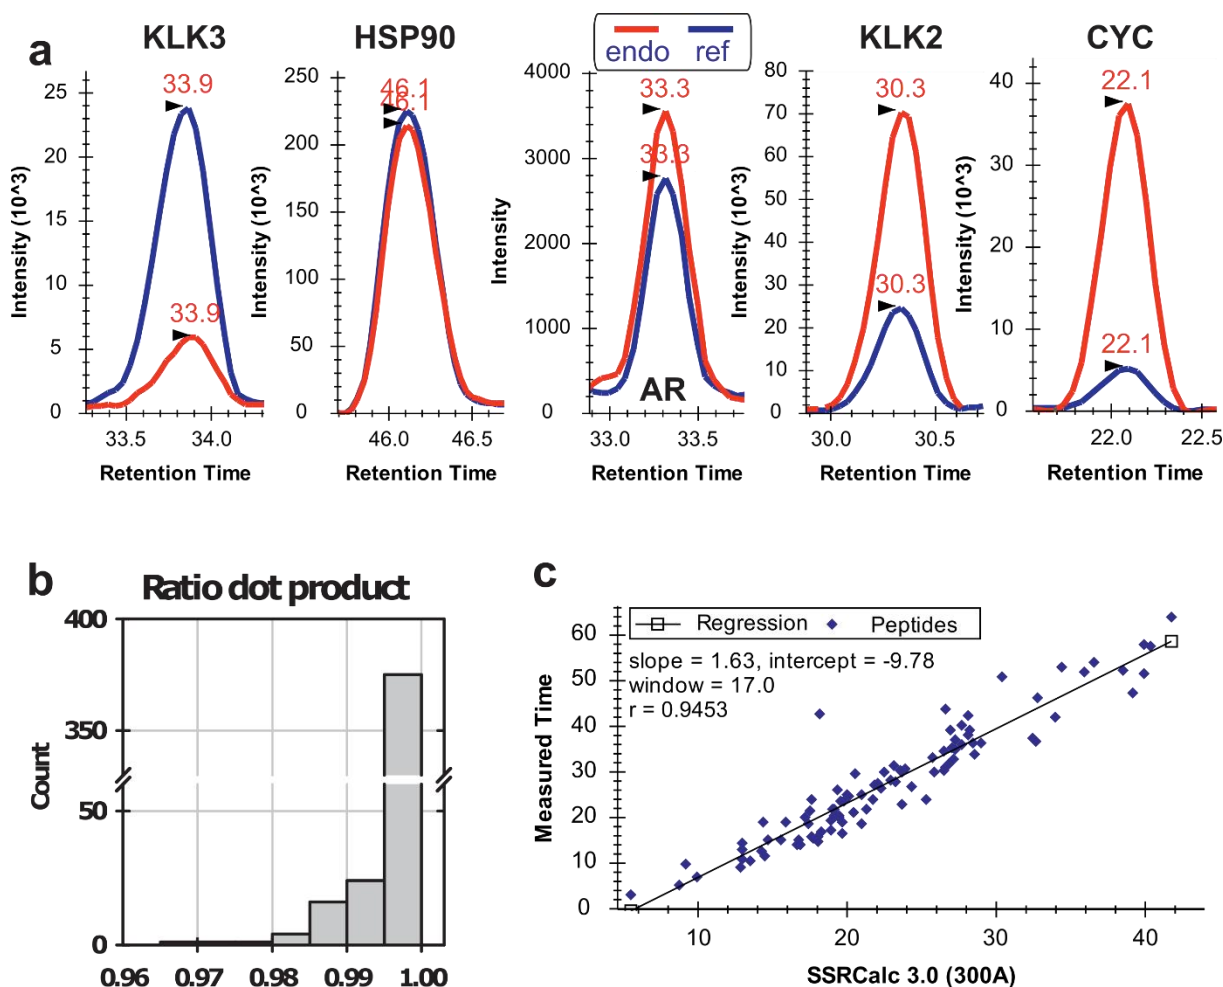

**Supplementary Figure 1: SRM assay development. Panel a:** Ion chromatograms of the sum of all transitions per peptide which are base line separated from other signals measured. In blue lines the sum of all transition of SILAC labelled peptides while in red are ion chromatograms of endogenous unlabelled peptides isolated from LNCaP cells. Both blue and red lines co-elute which adds further evidence for high confidence SRM assays. Protein names given are official gene names. **Panel b:** The ratio-dot-product is a mathematical description of how similar both SILAC labelled and non-labelled peptide fragments elute, e.g. relative ratio of transitions measured. A score of 1 means identical pattern in both SILAC and non-labelled transitions. The great majority of peptides have a ratio-dot-products of greater than 0.99 indicative of high quality SRM assays. **Panel c:** Measured retention time is plotted as a function of theoretically calculated retention time SSRCalc 3.0 (as function of primary amino acid sequence of the peptide). A linear regression line has a very good r value ( $r = 0.95$ ) further supporting the notion of high quality SRM assays.

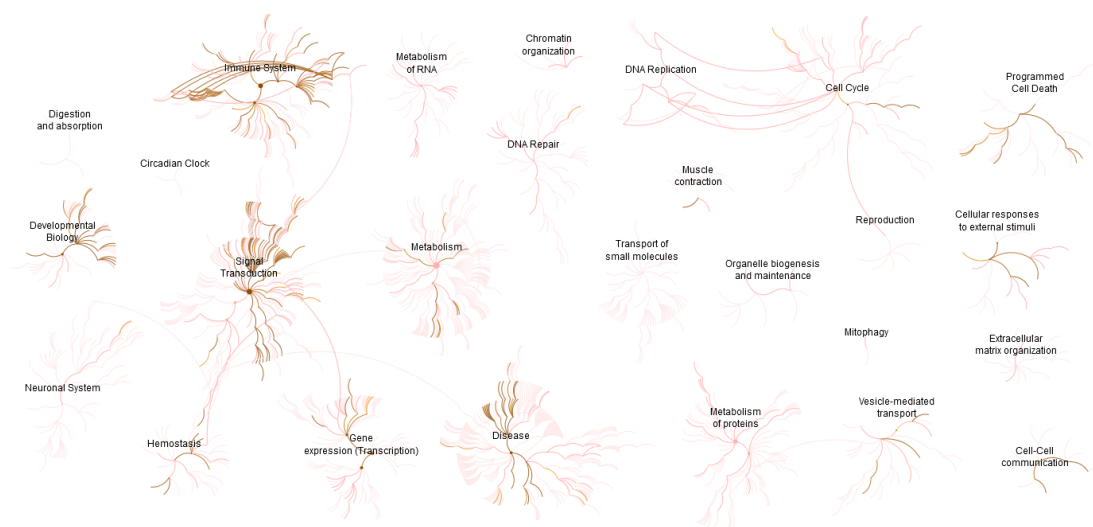

**Supplementary Figure 2: Pathway enrichment analysis: visualization.** All quantified 52 proteins were analysed using RACTOME pathway enrichment analysis tool REACTOME. A visual representation of the results shows a large coverage of many pathways, e.g. programmed cell death, signal transduction and immune system.

## 2\_BEZ-DMSO

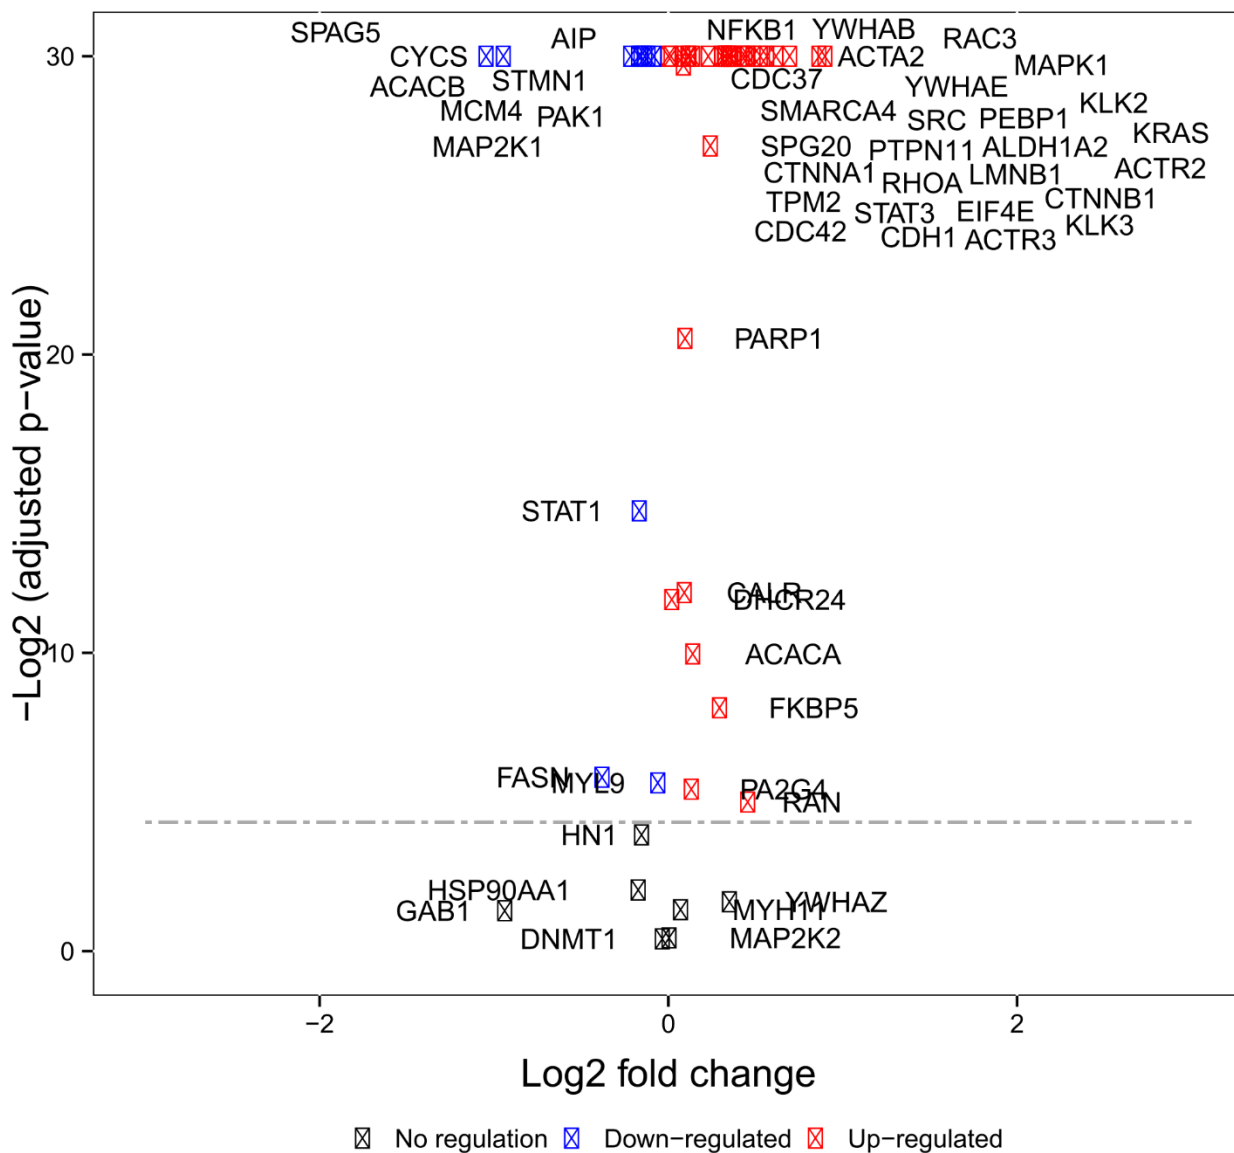



### 3\_DAS-DMSO

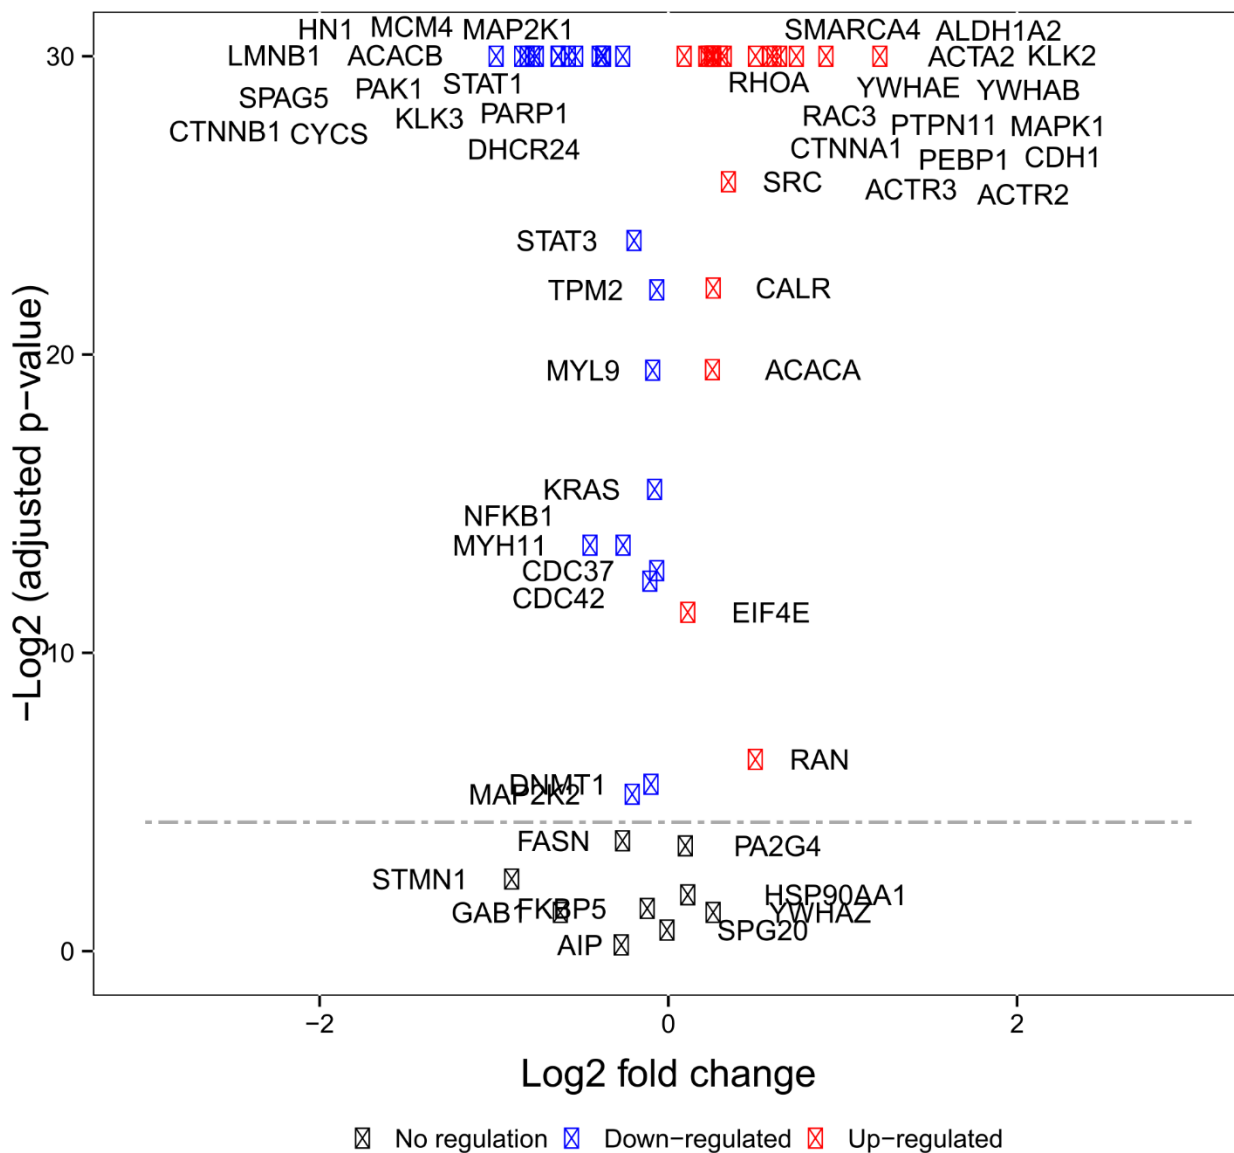

## 4\_DAS-TEM

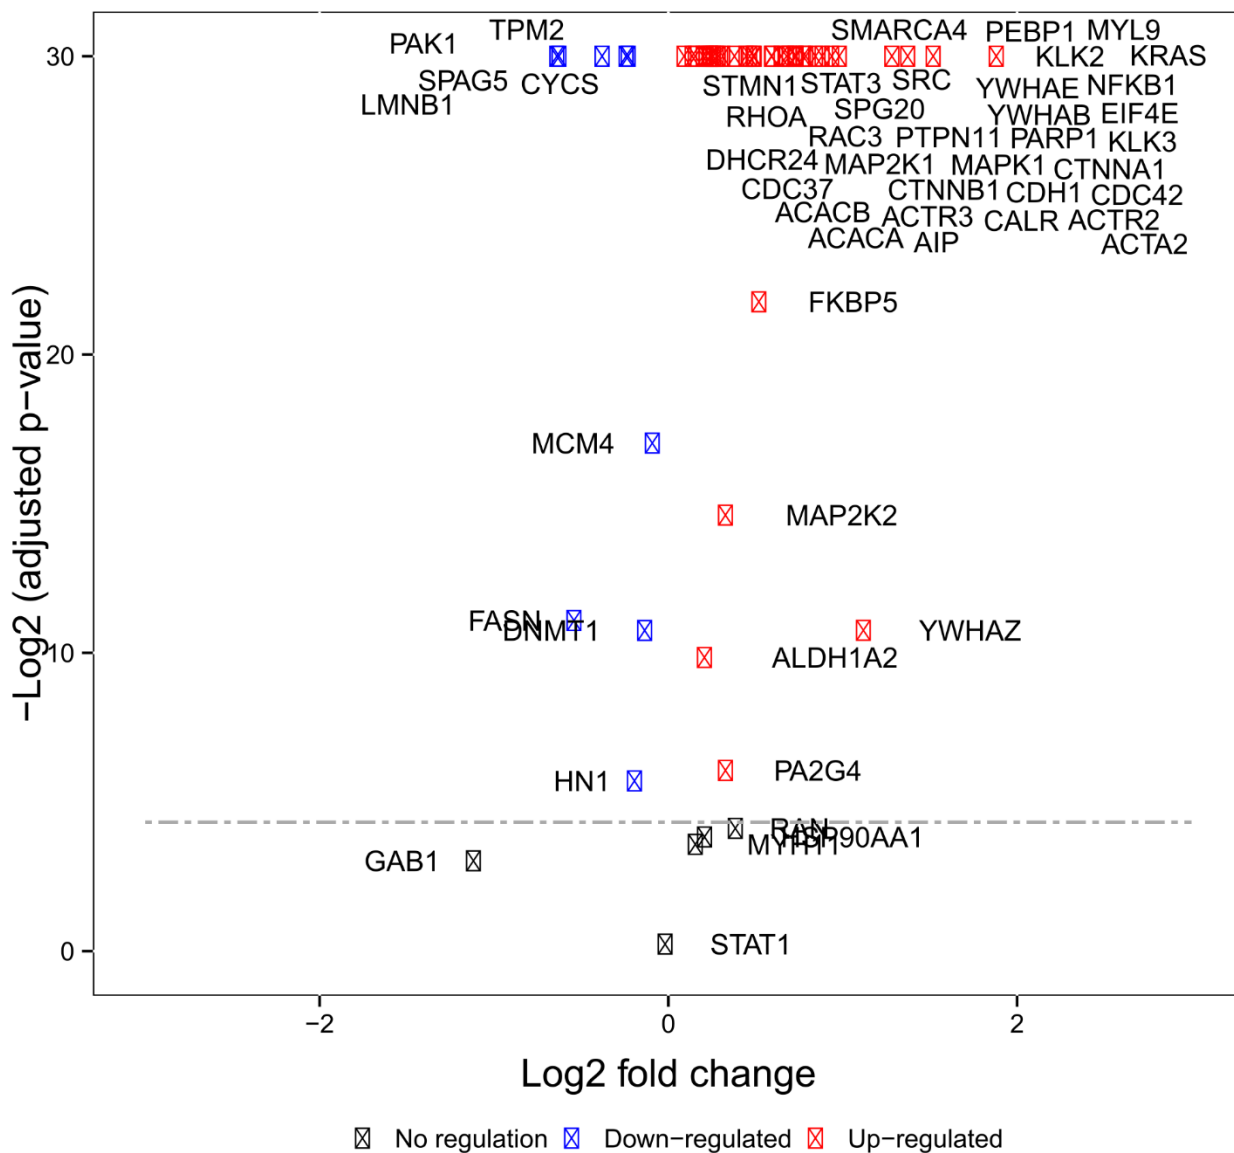

## 5\_ENZ-DMSO

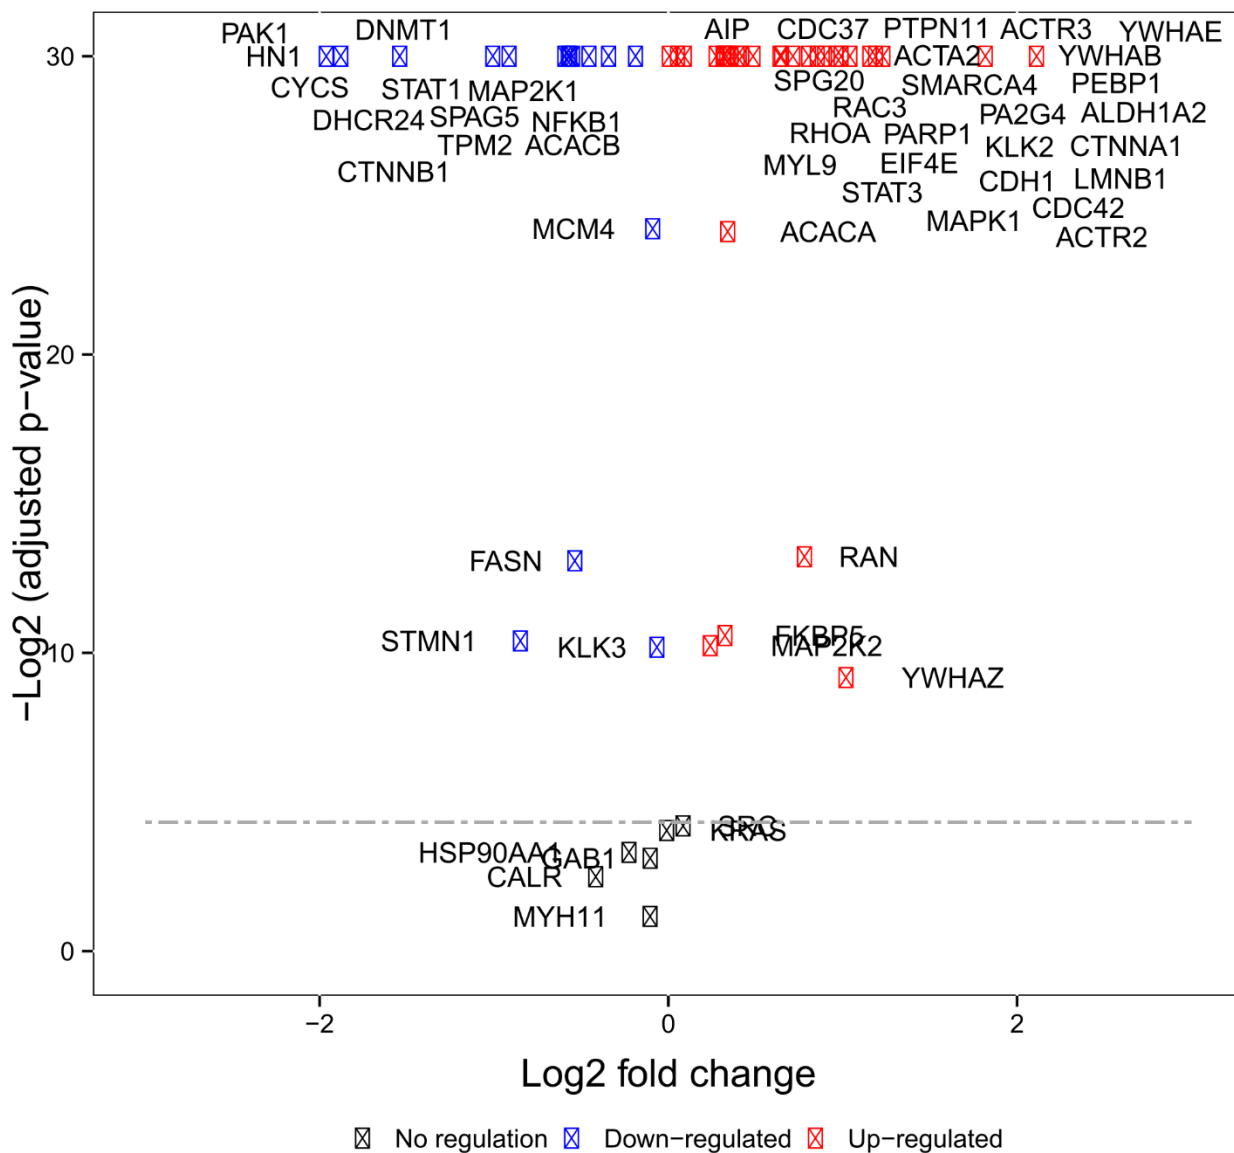

## 6\_DOC-MK2

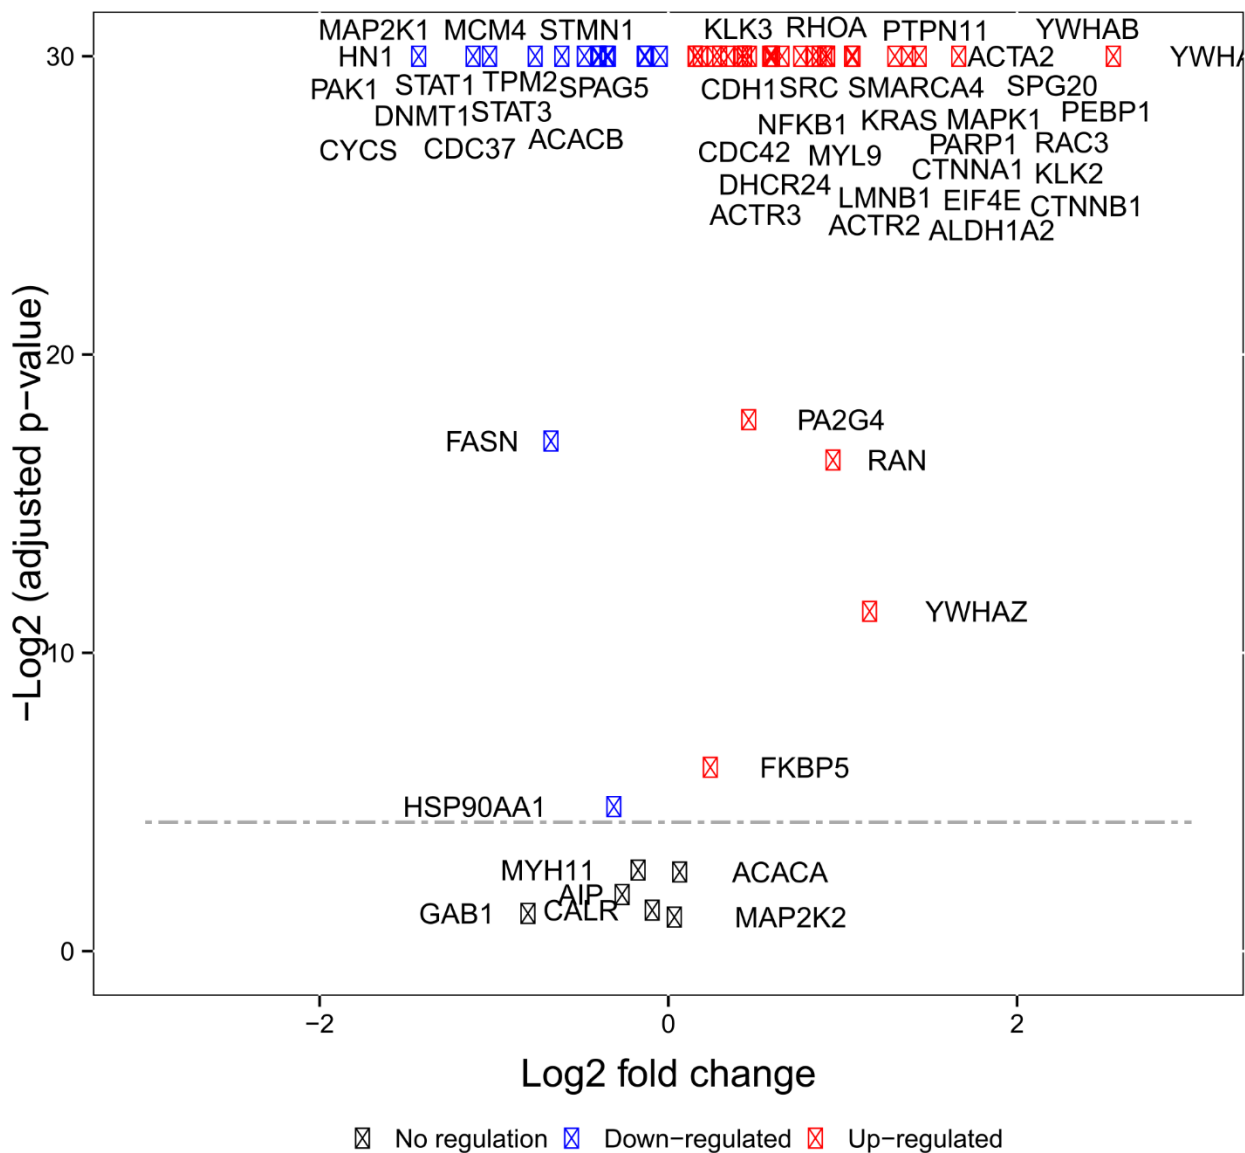

## 7\_TEM-DMSO

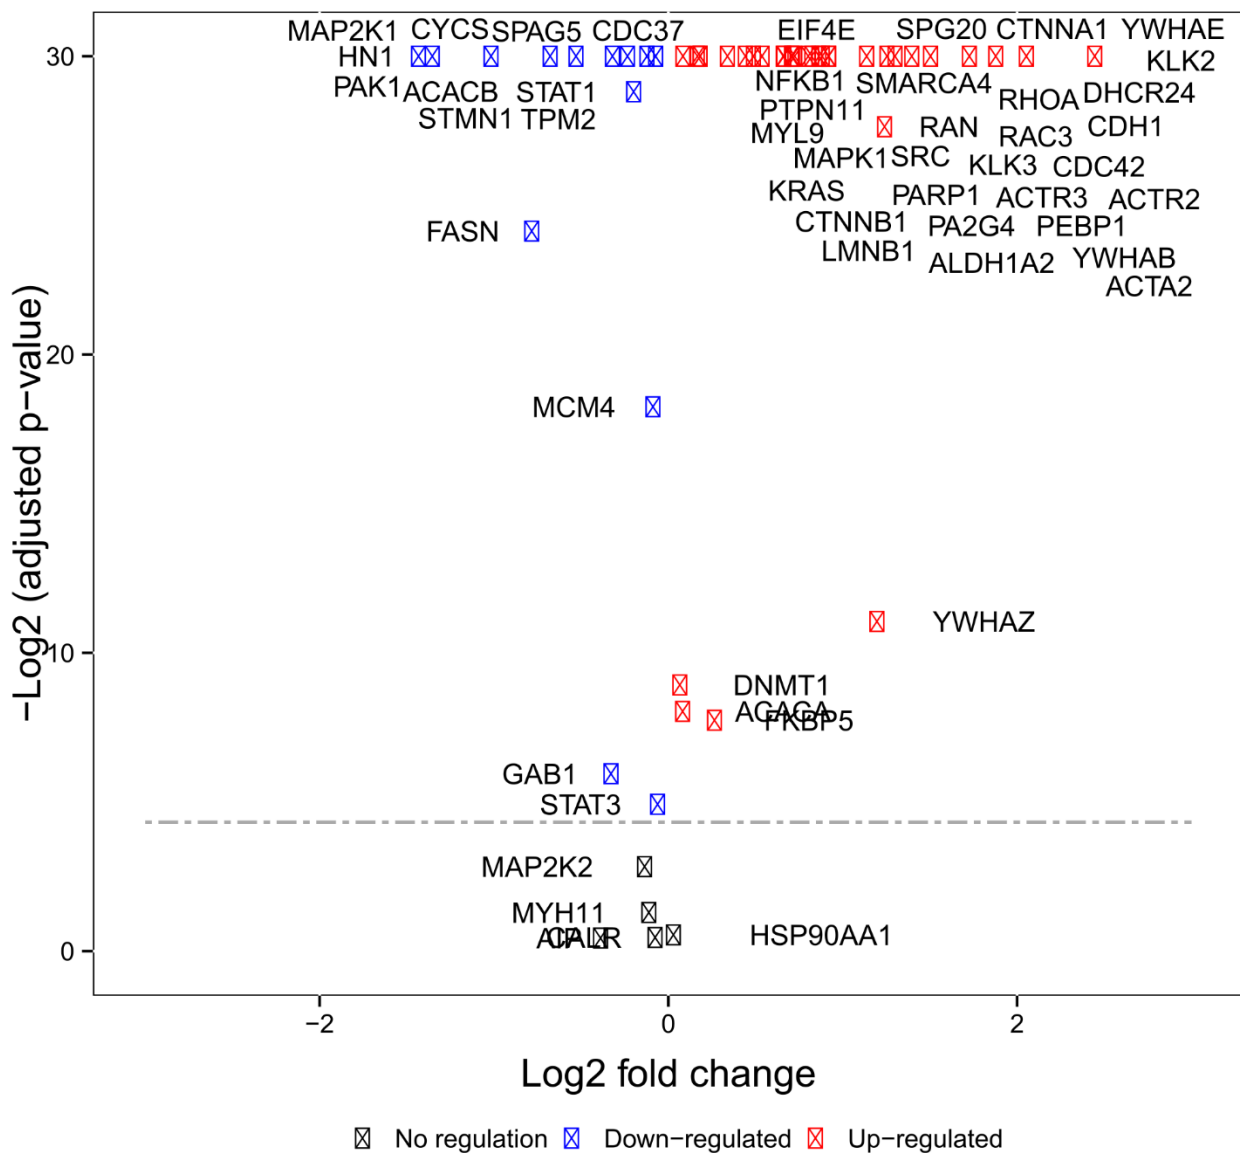

## 8\_BEZ-DAS

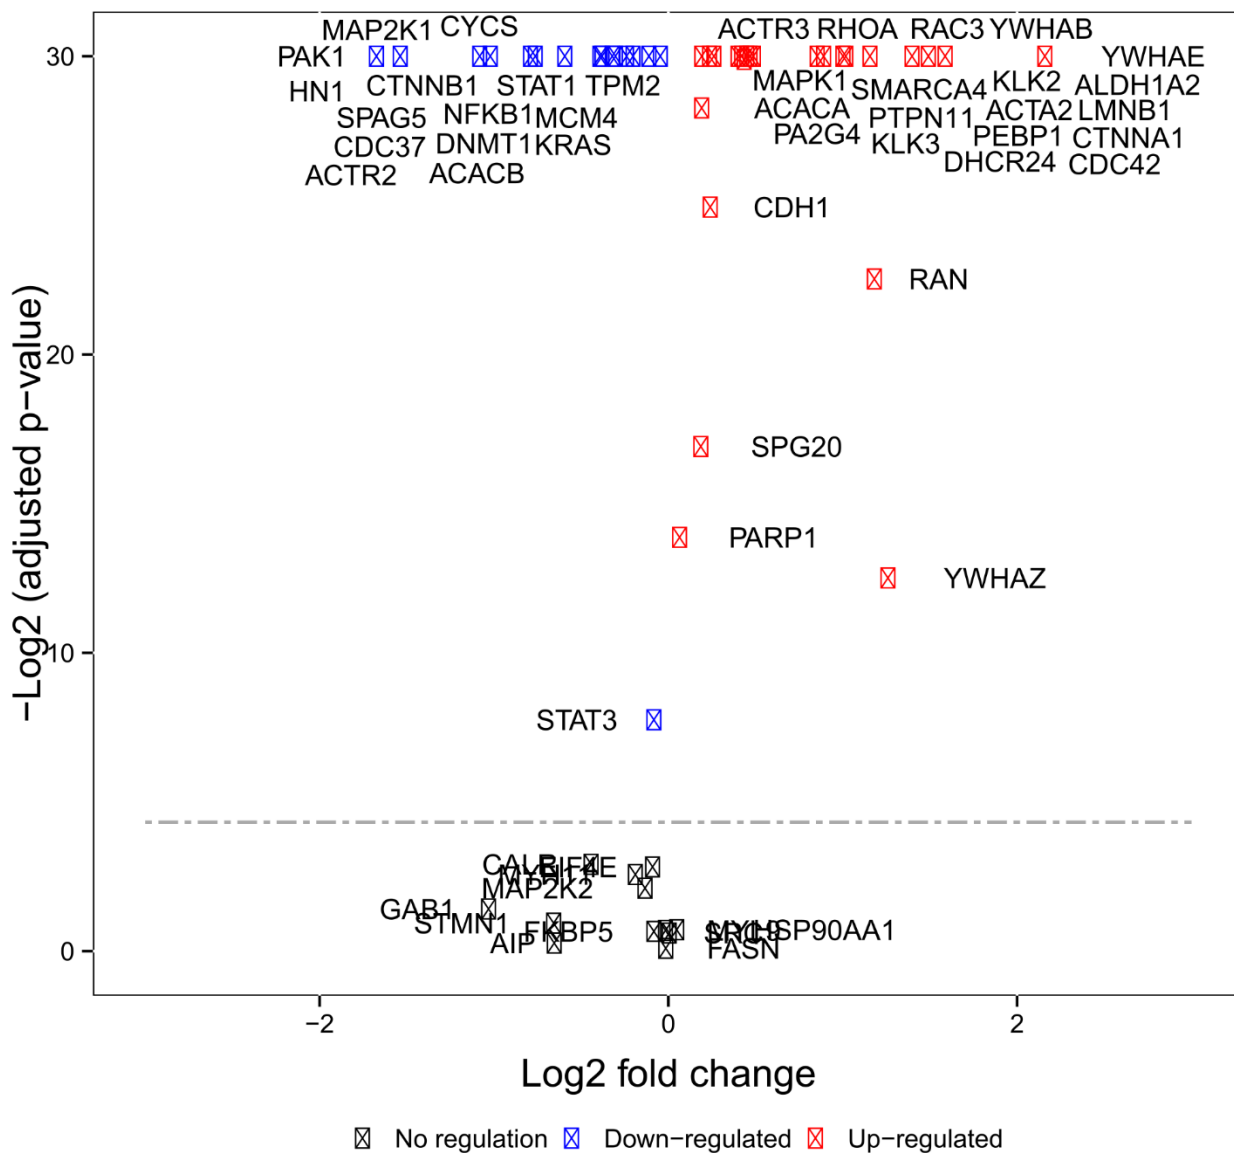

## 9\_BEZ-DOC

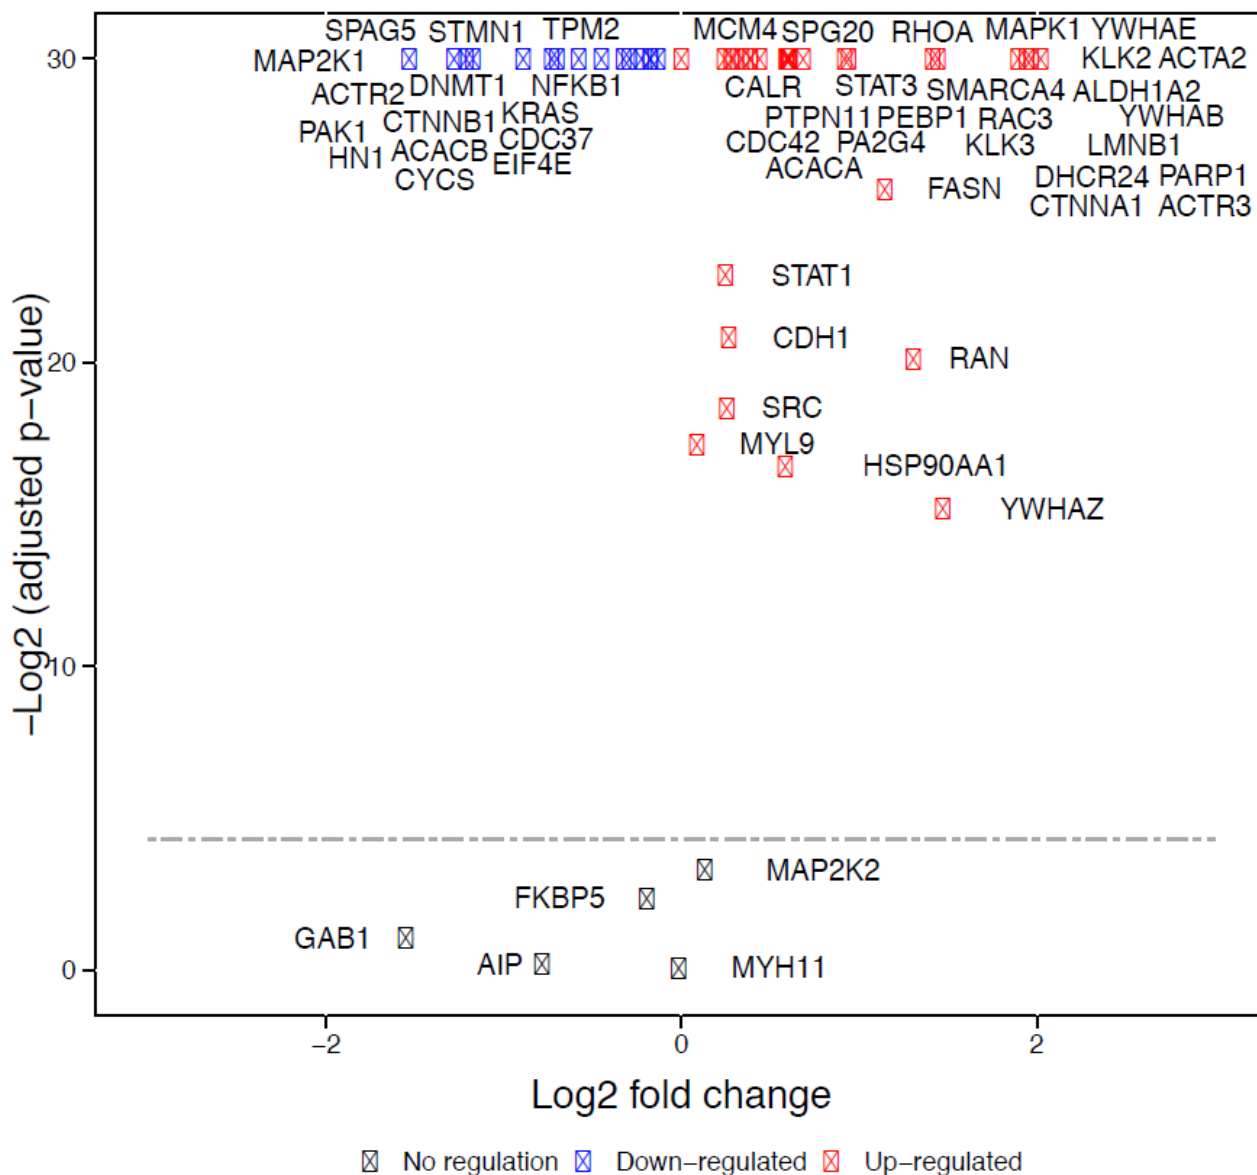

# 10\_BEZ-ENZ

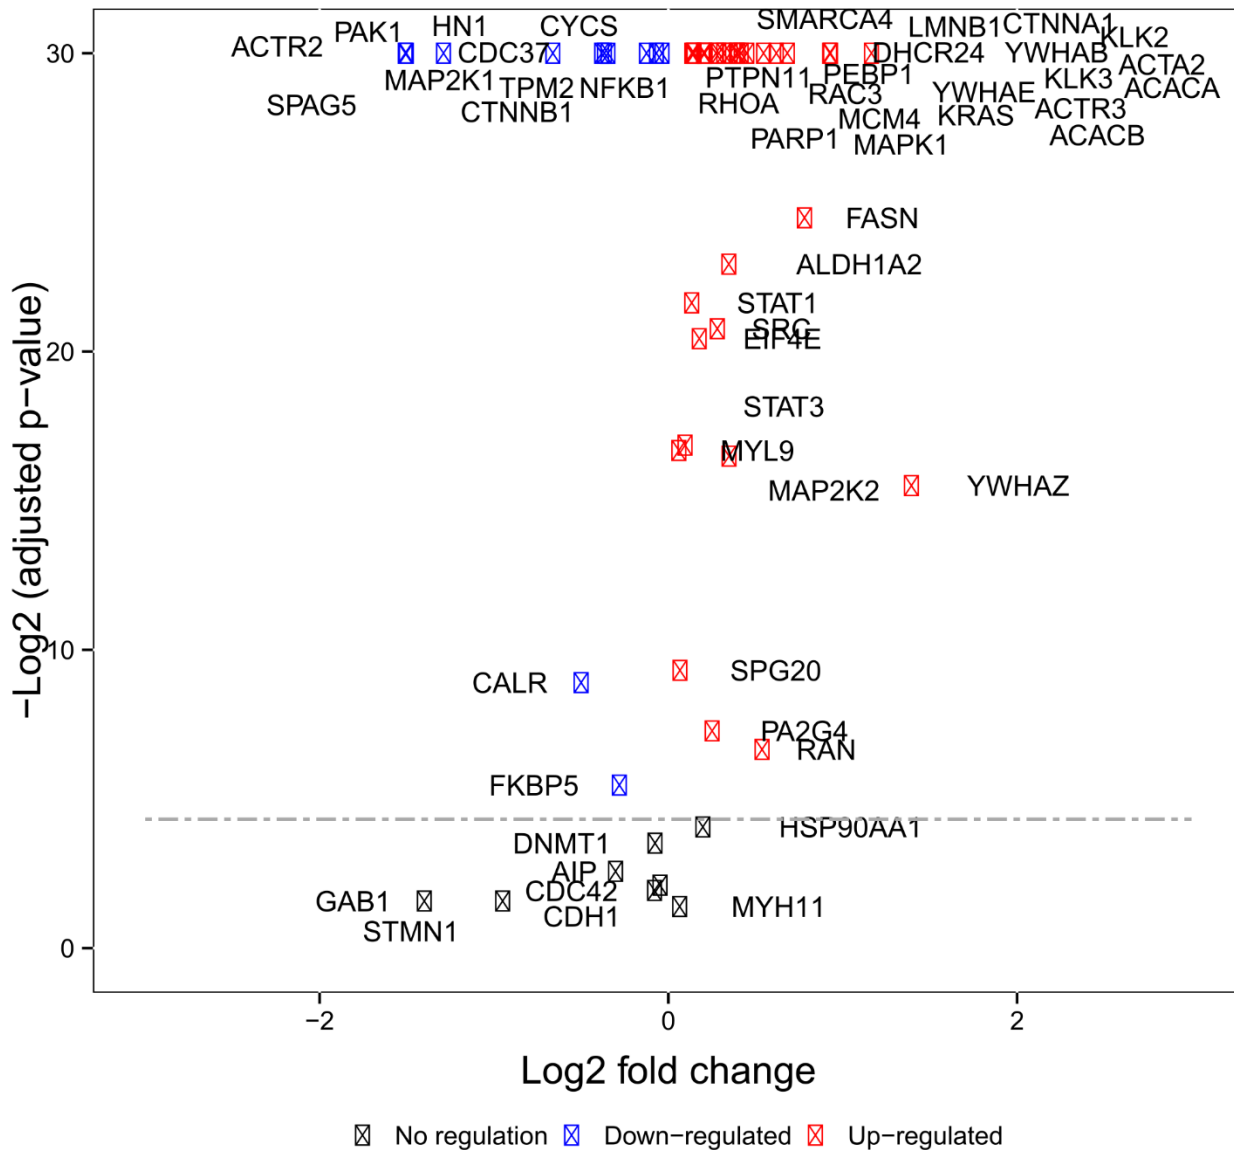



## 11\_BEZ-MK2

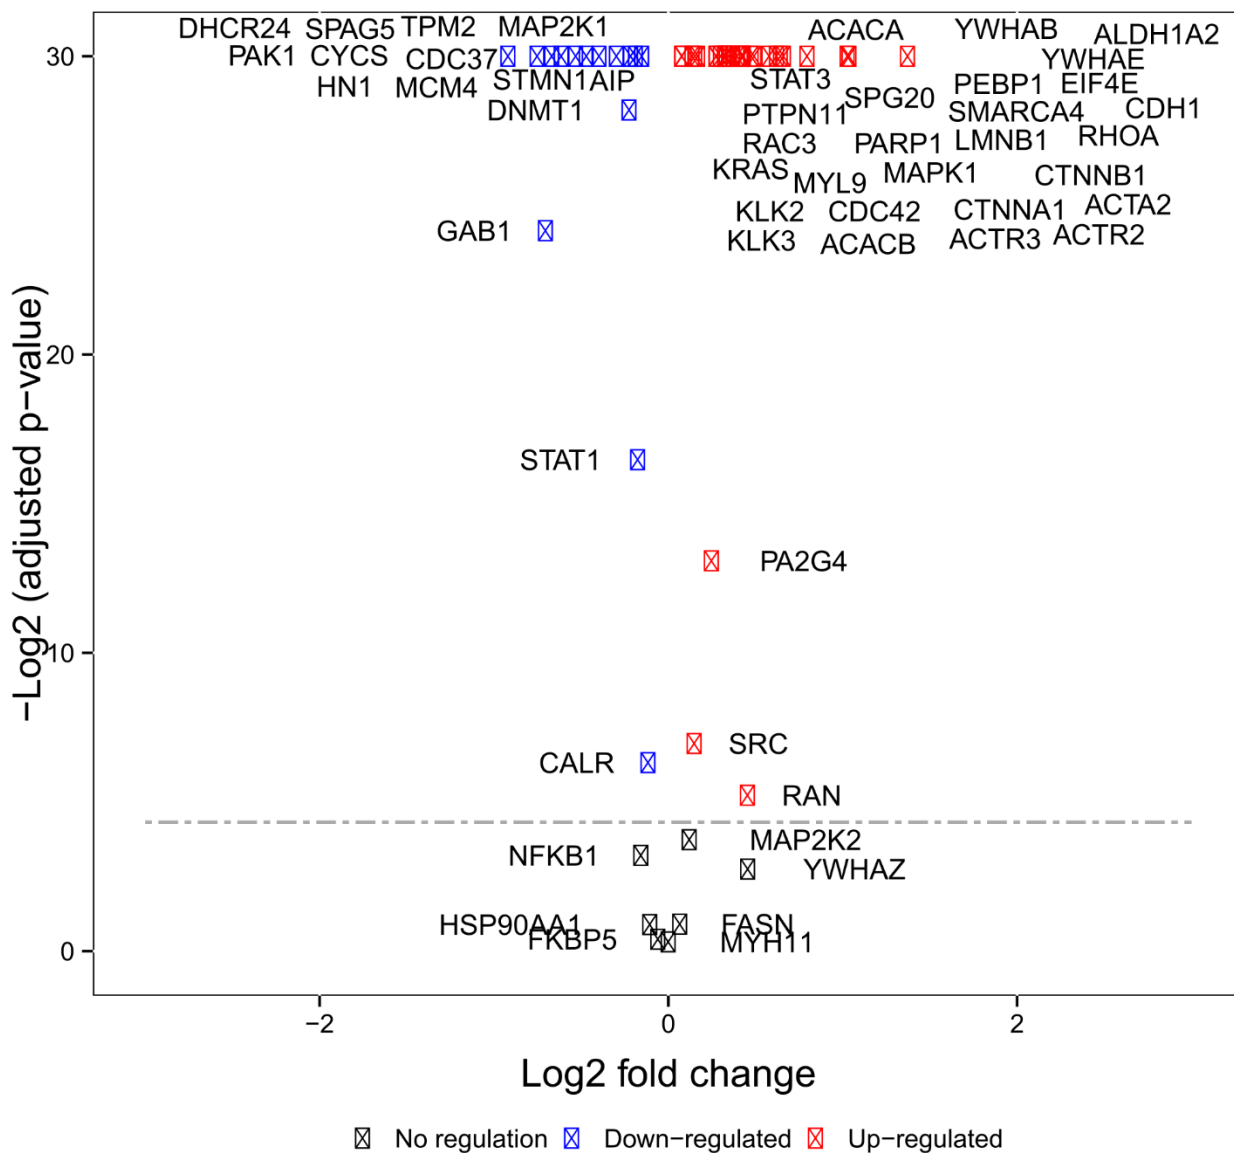

## 12\_BEZ-TEM

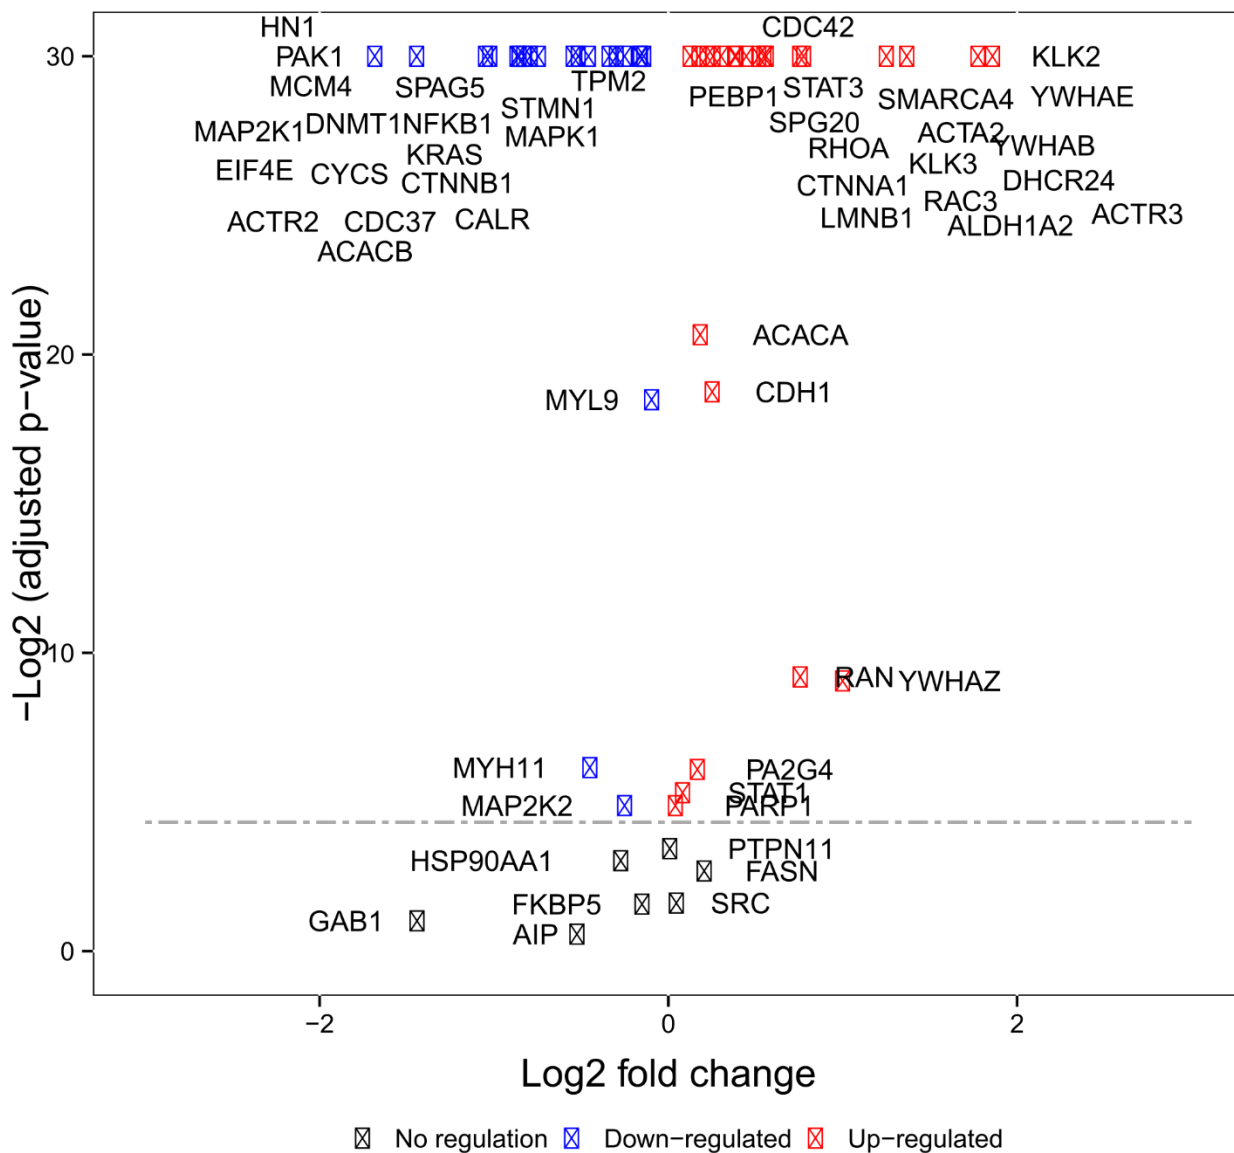

# 13\_DAS-DOC

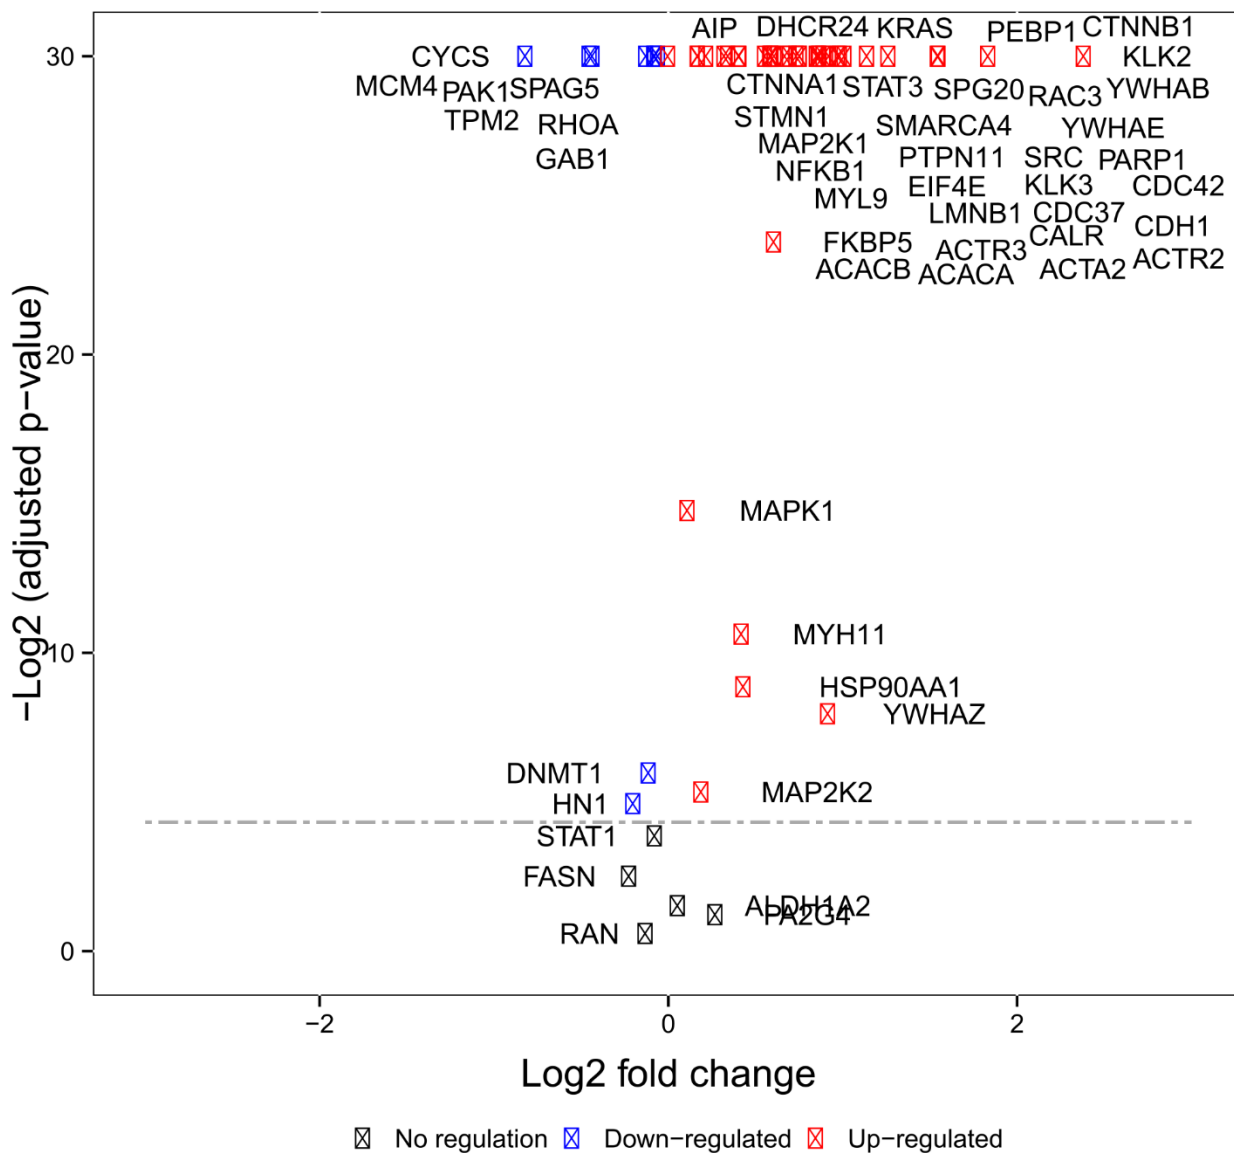

# 14\_DAS-ENZ

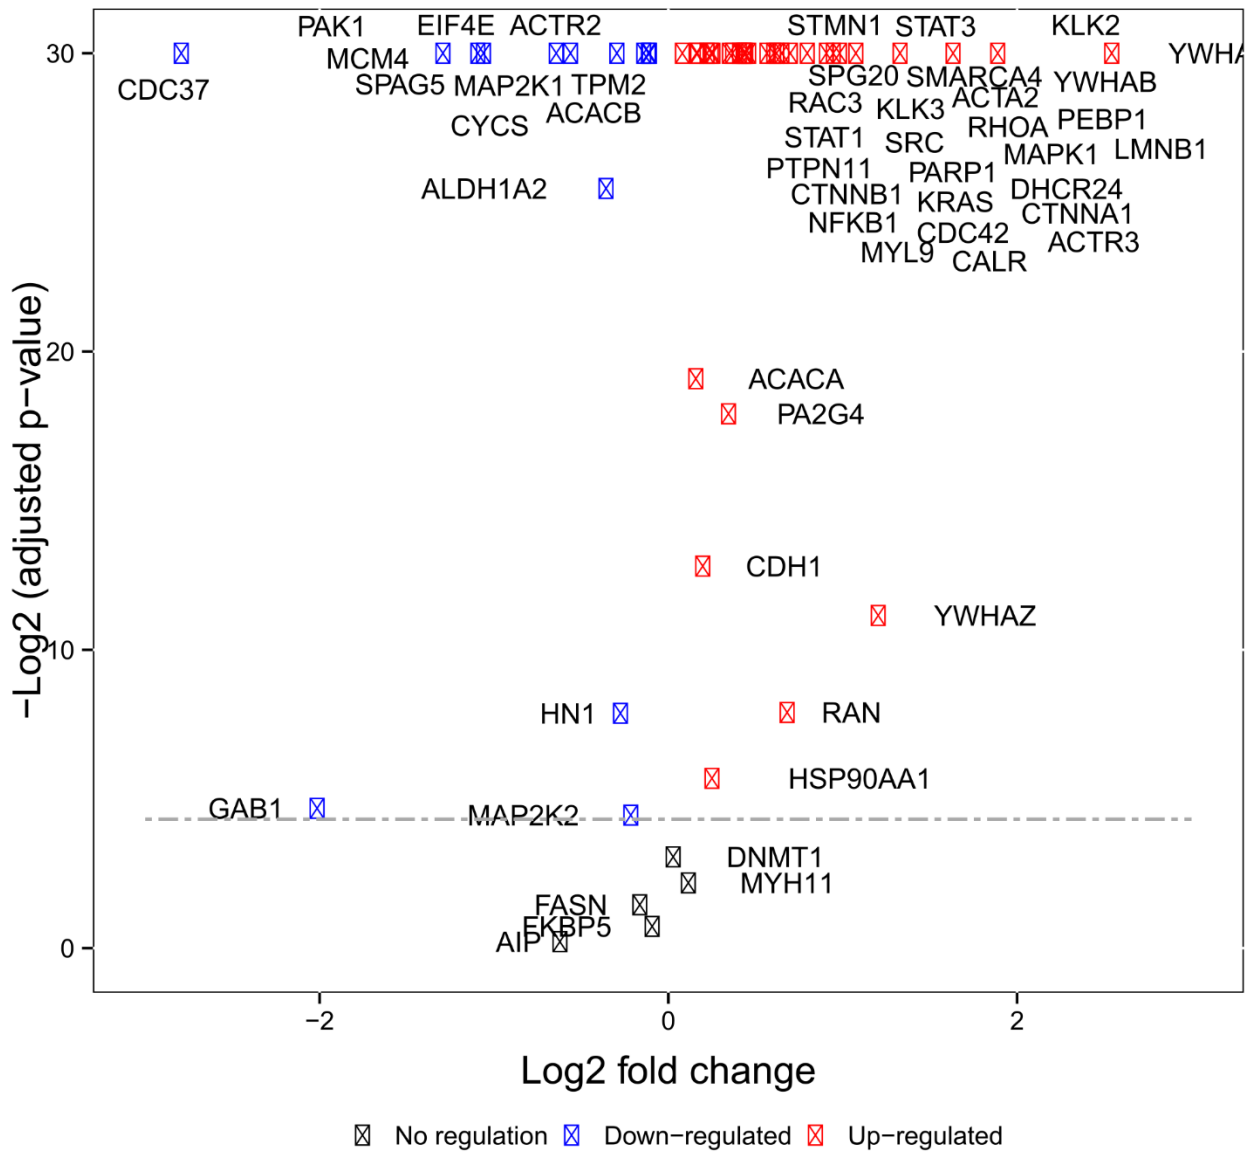

## 15\_DAS-MK2

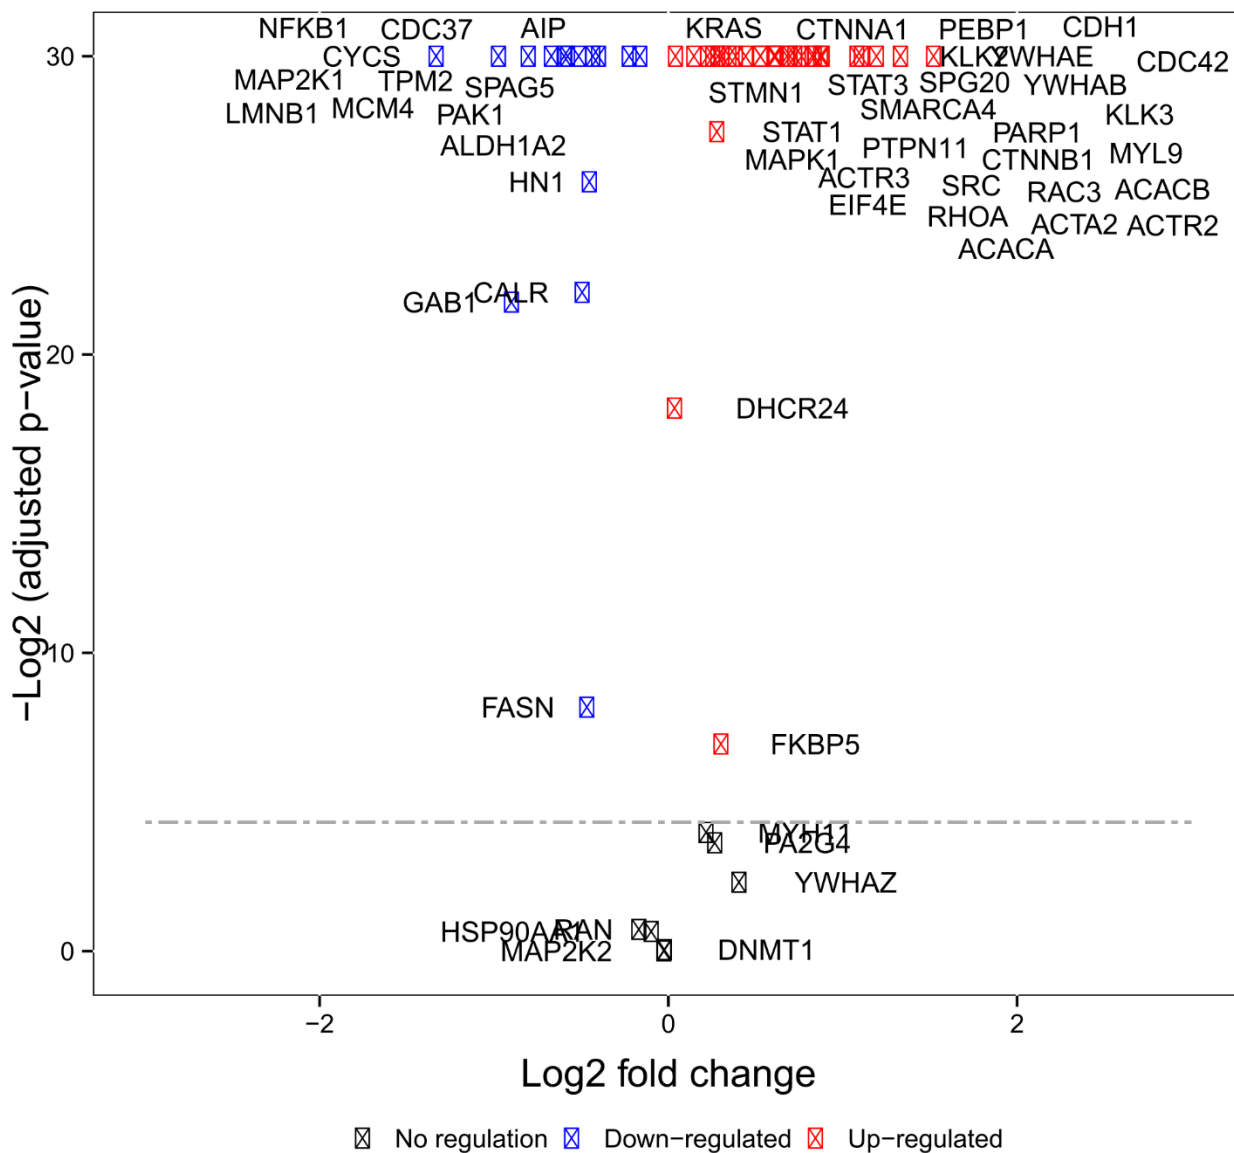

## 16\_DAS-TEM

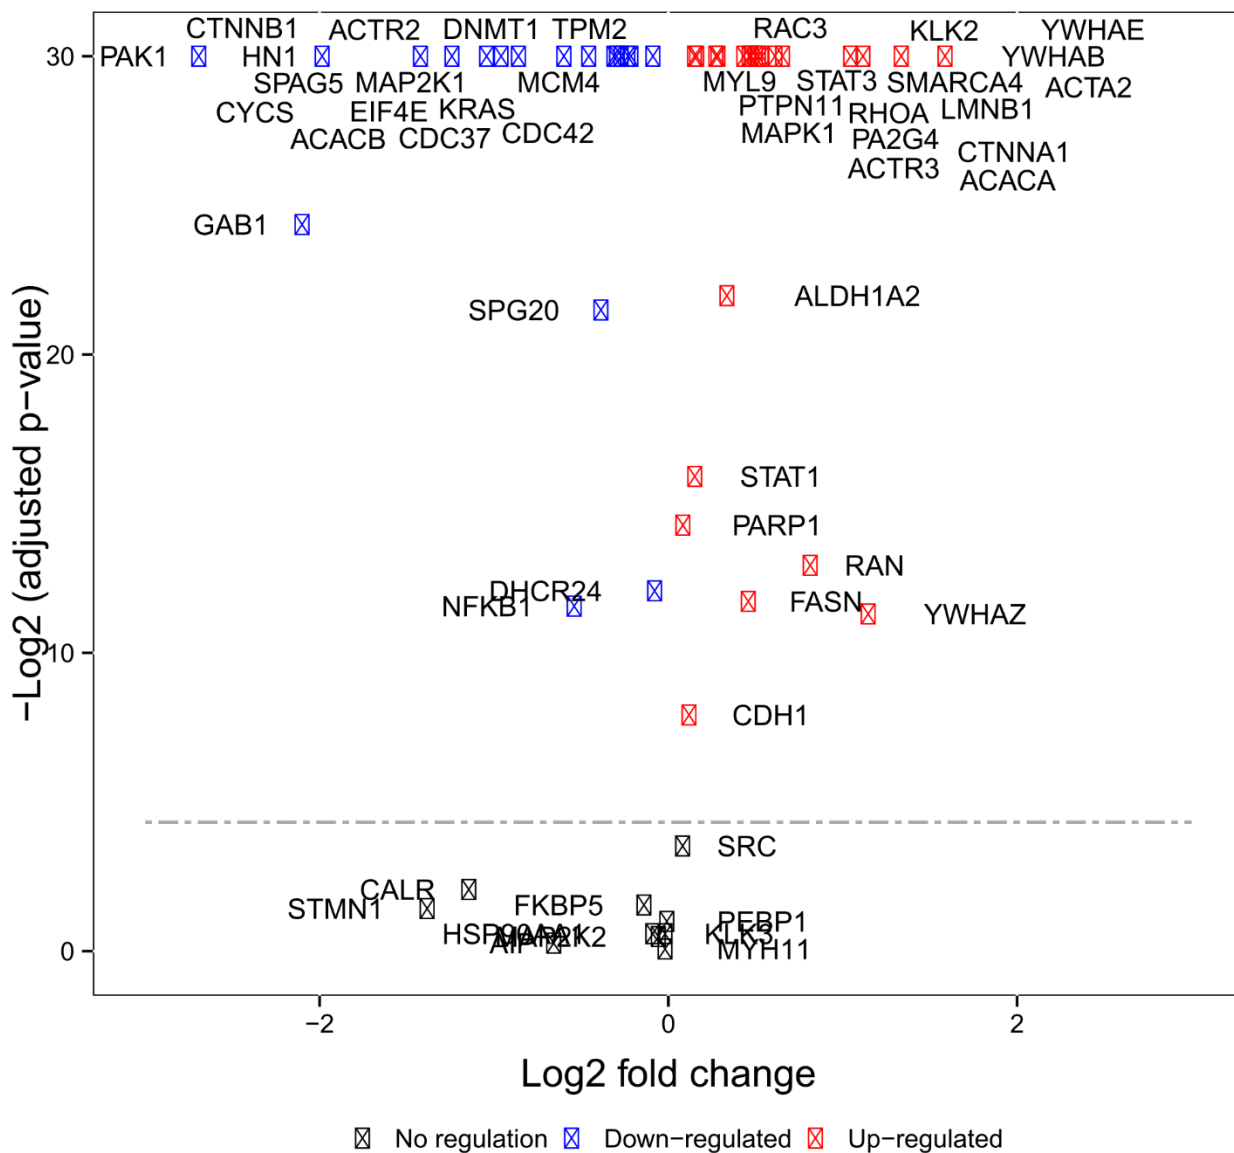

# 17\_DOC-ENZ

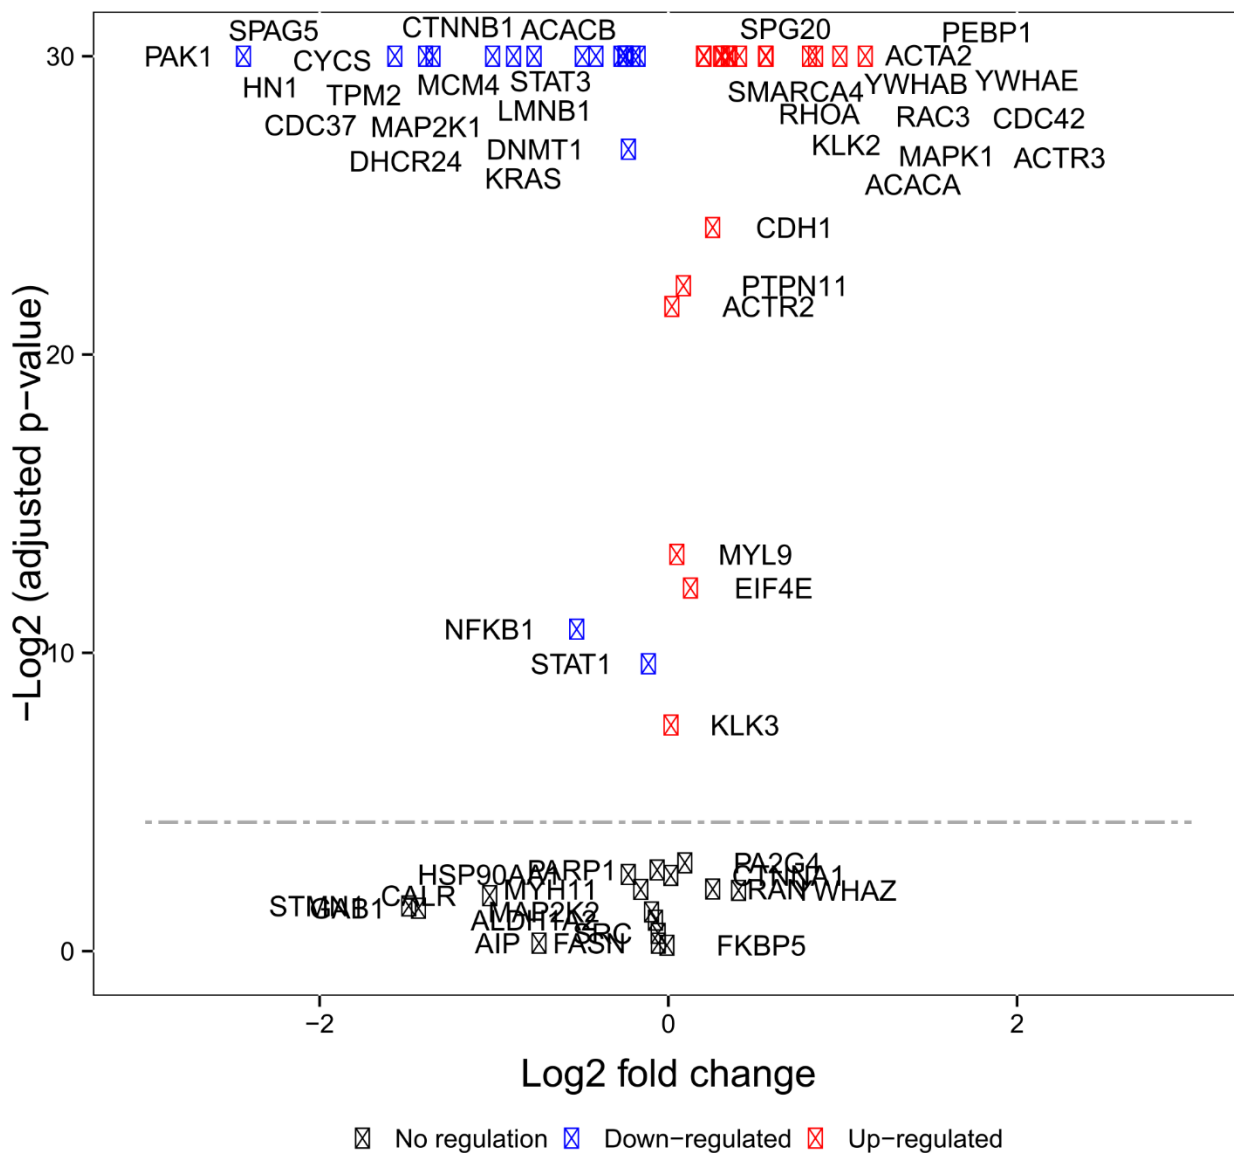

## 18\_DOC-TEM

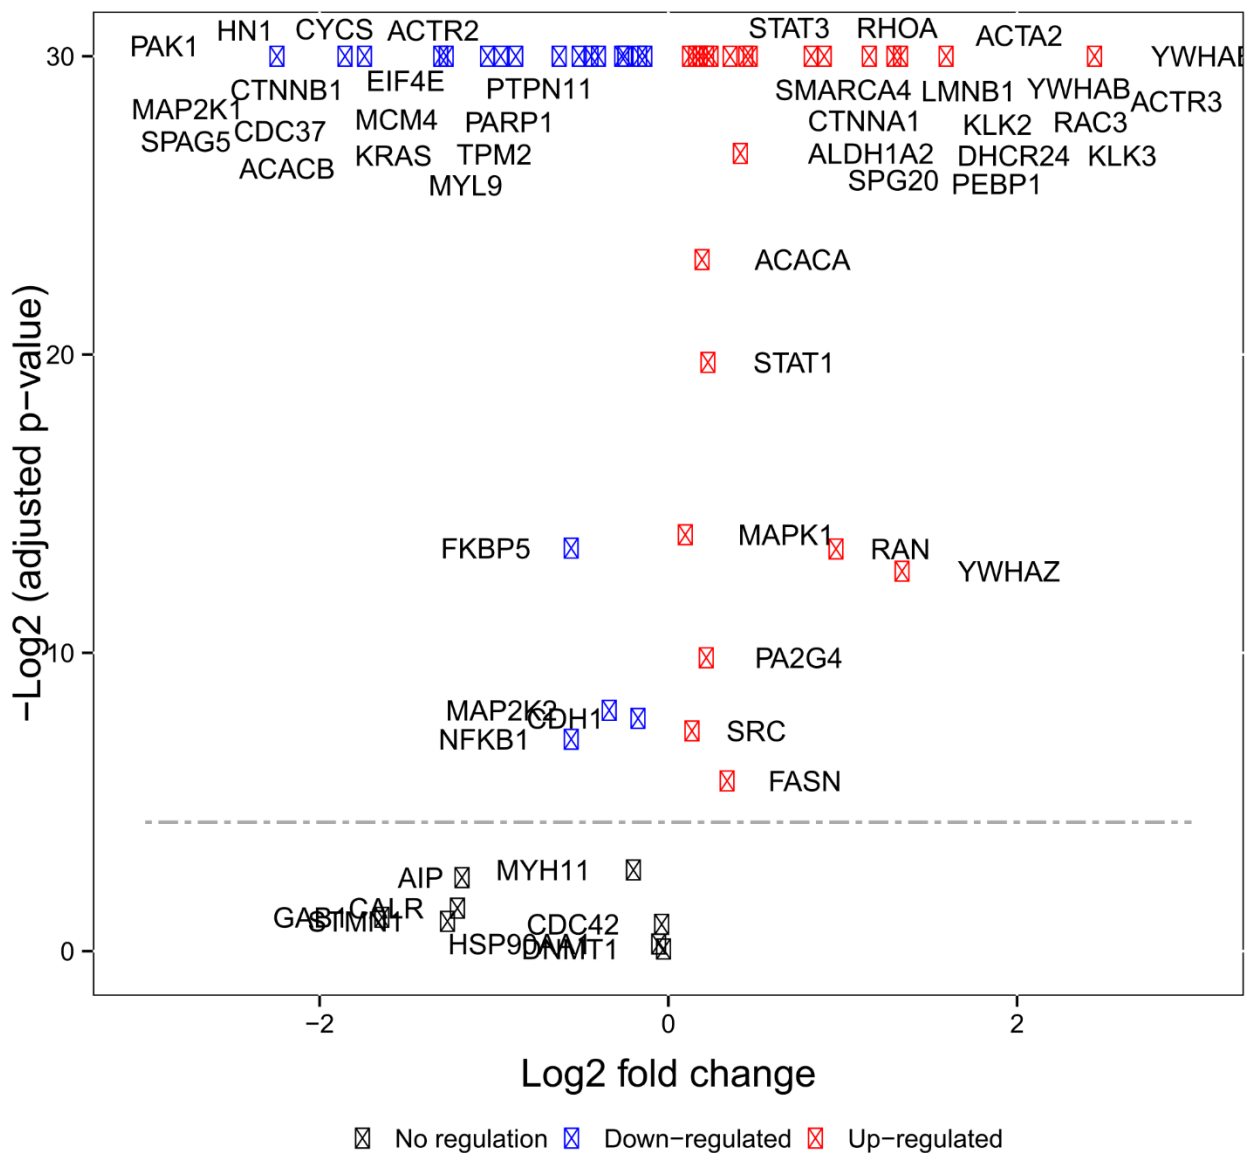



# 19\_DOC-TEM

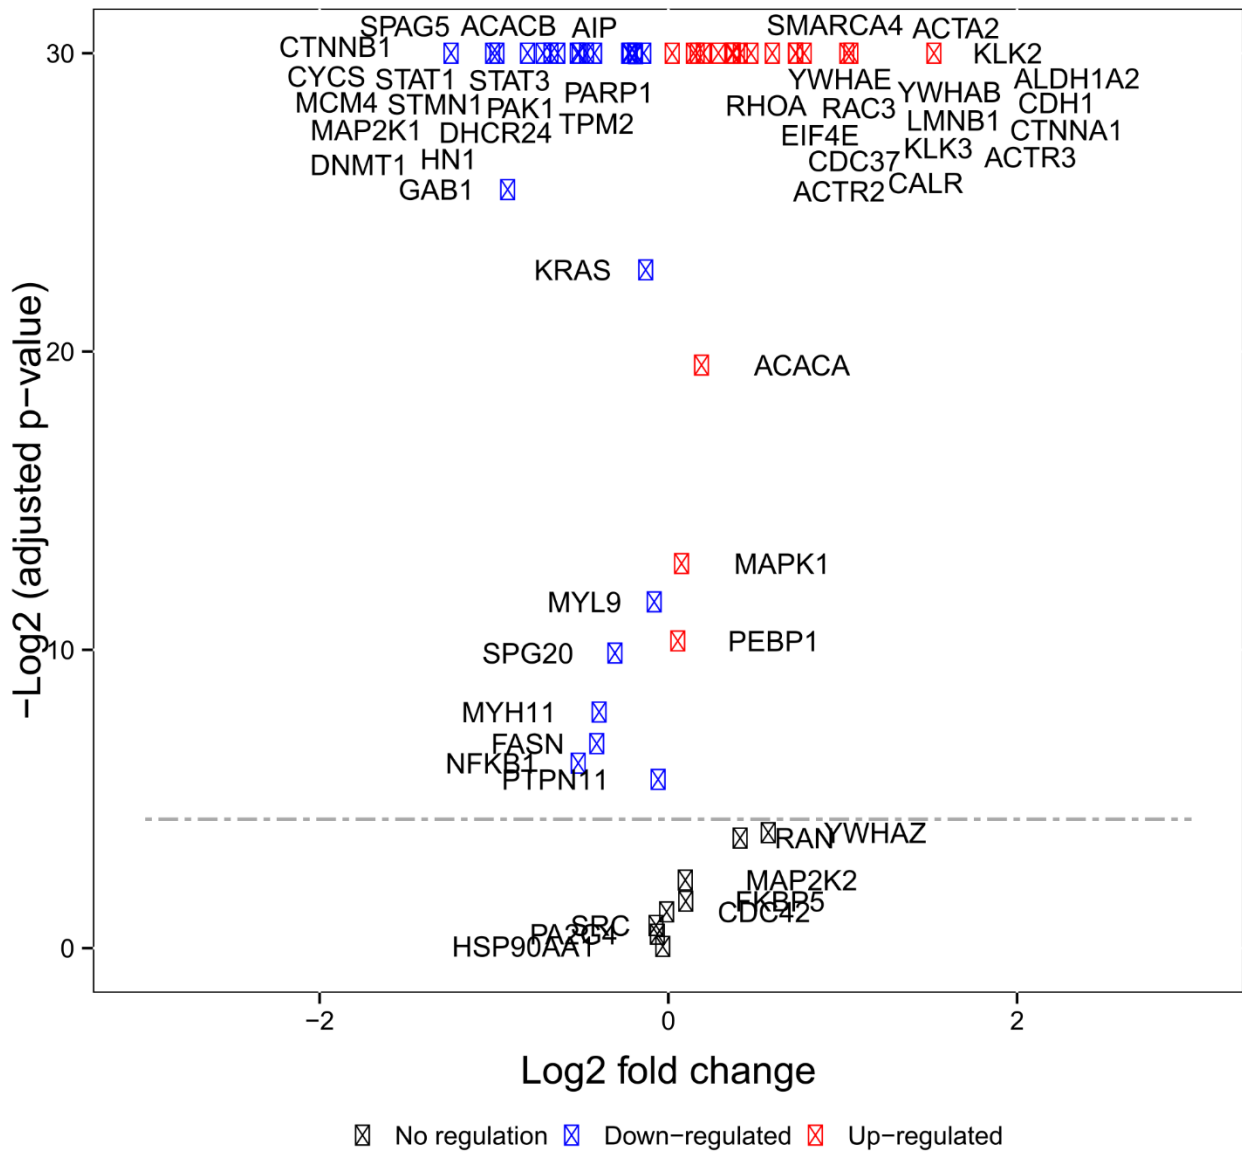

## 20\_ENZ-MK2

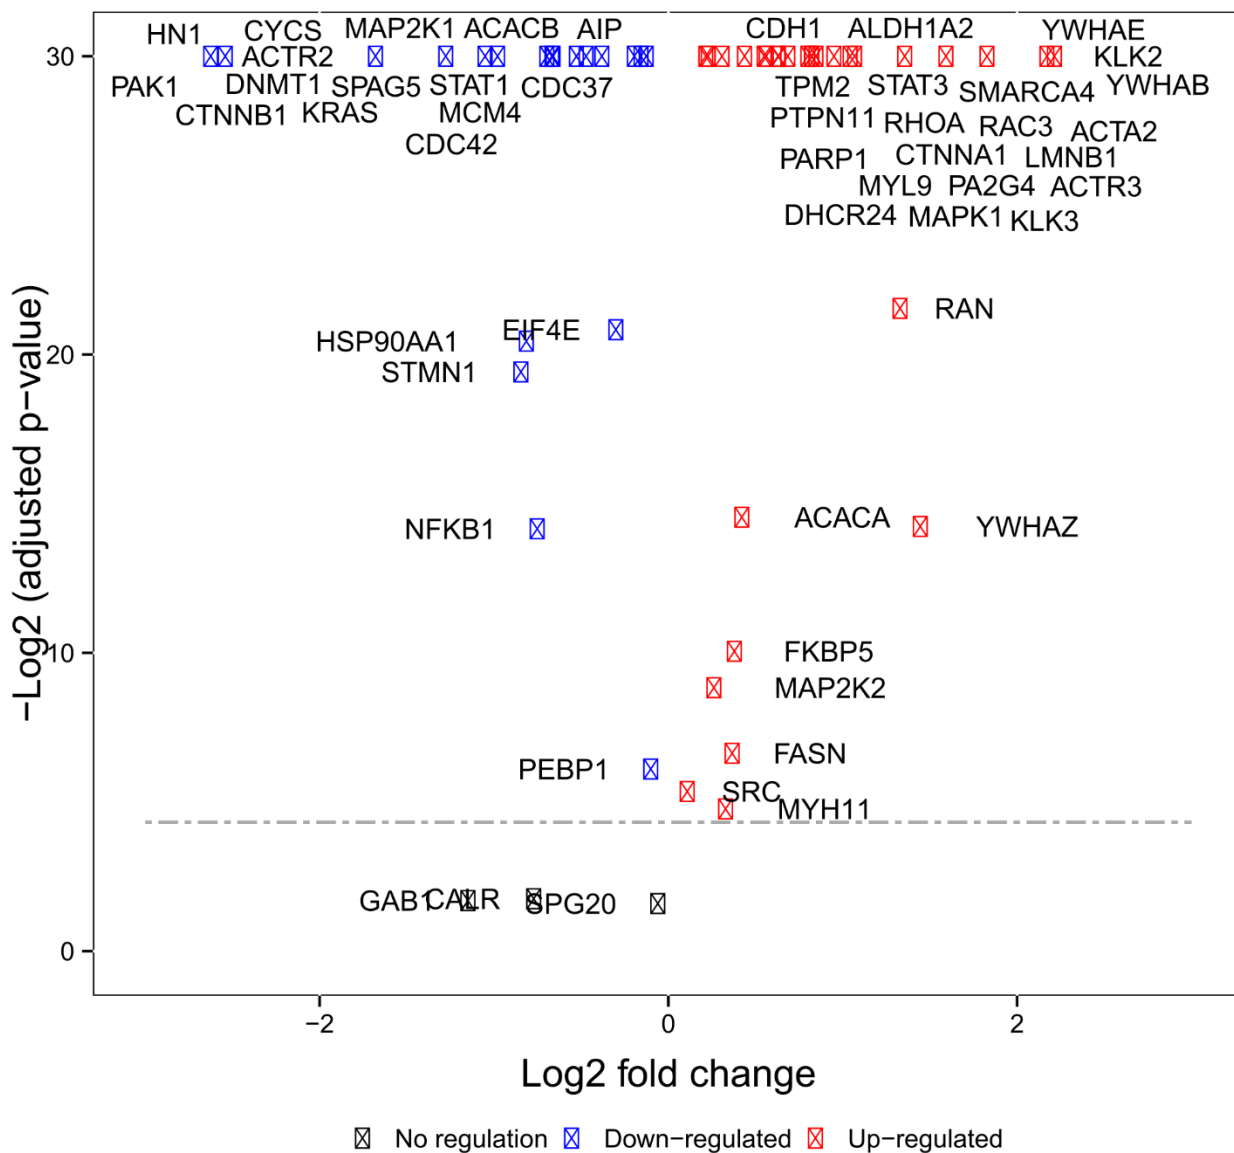

## 21\_ENZ-TEM

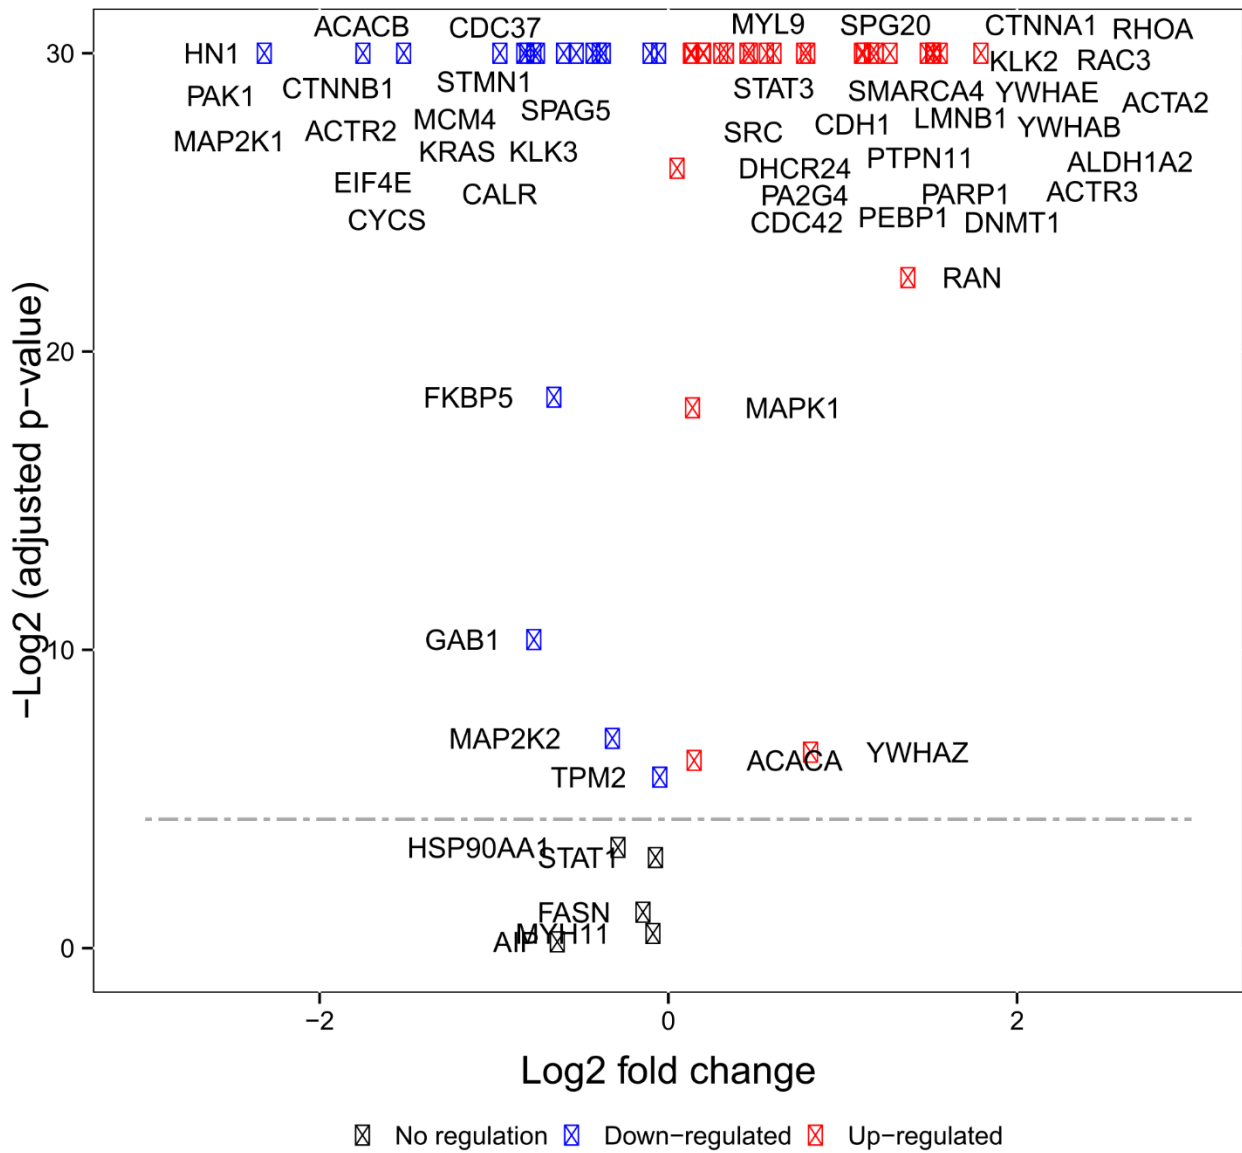



Supplementary Data: Systems pharmacology using mass spectrometry identifies critical response nodes in prostate cancer by Ehardt HA, Root A, Liu Y, Gauthier N, Sander C, Aebersold R.

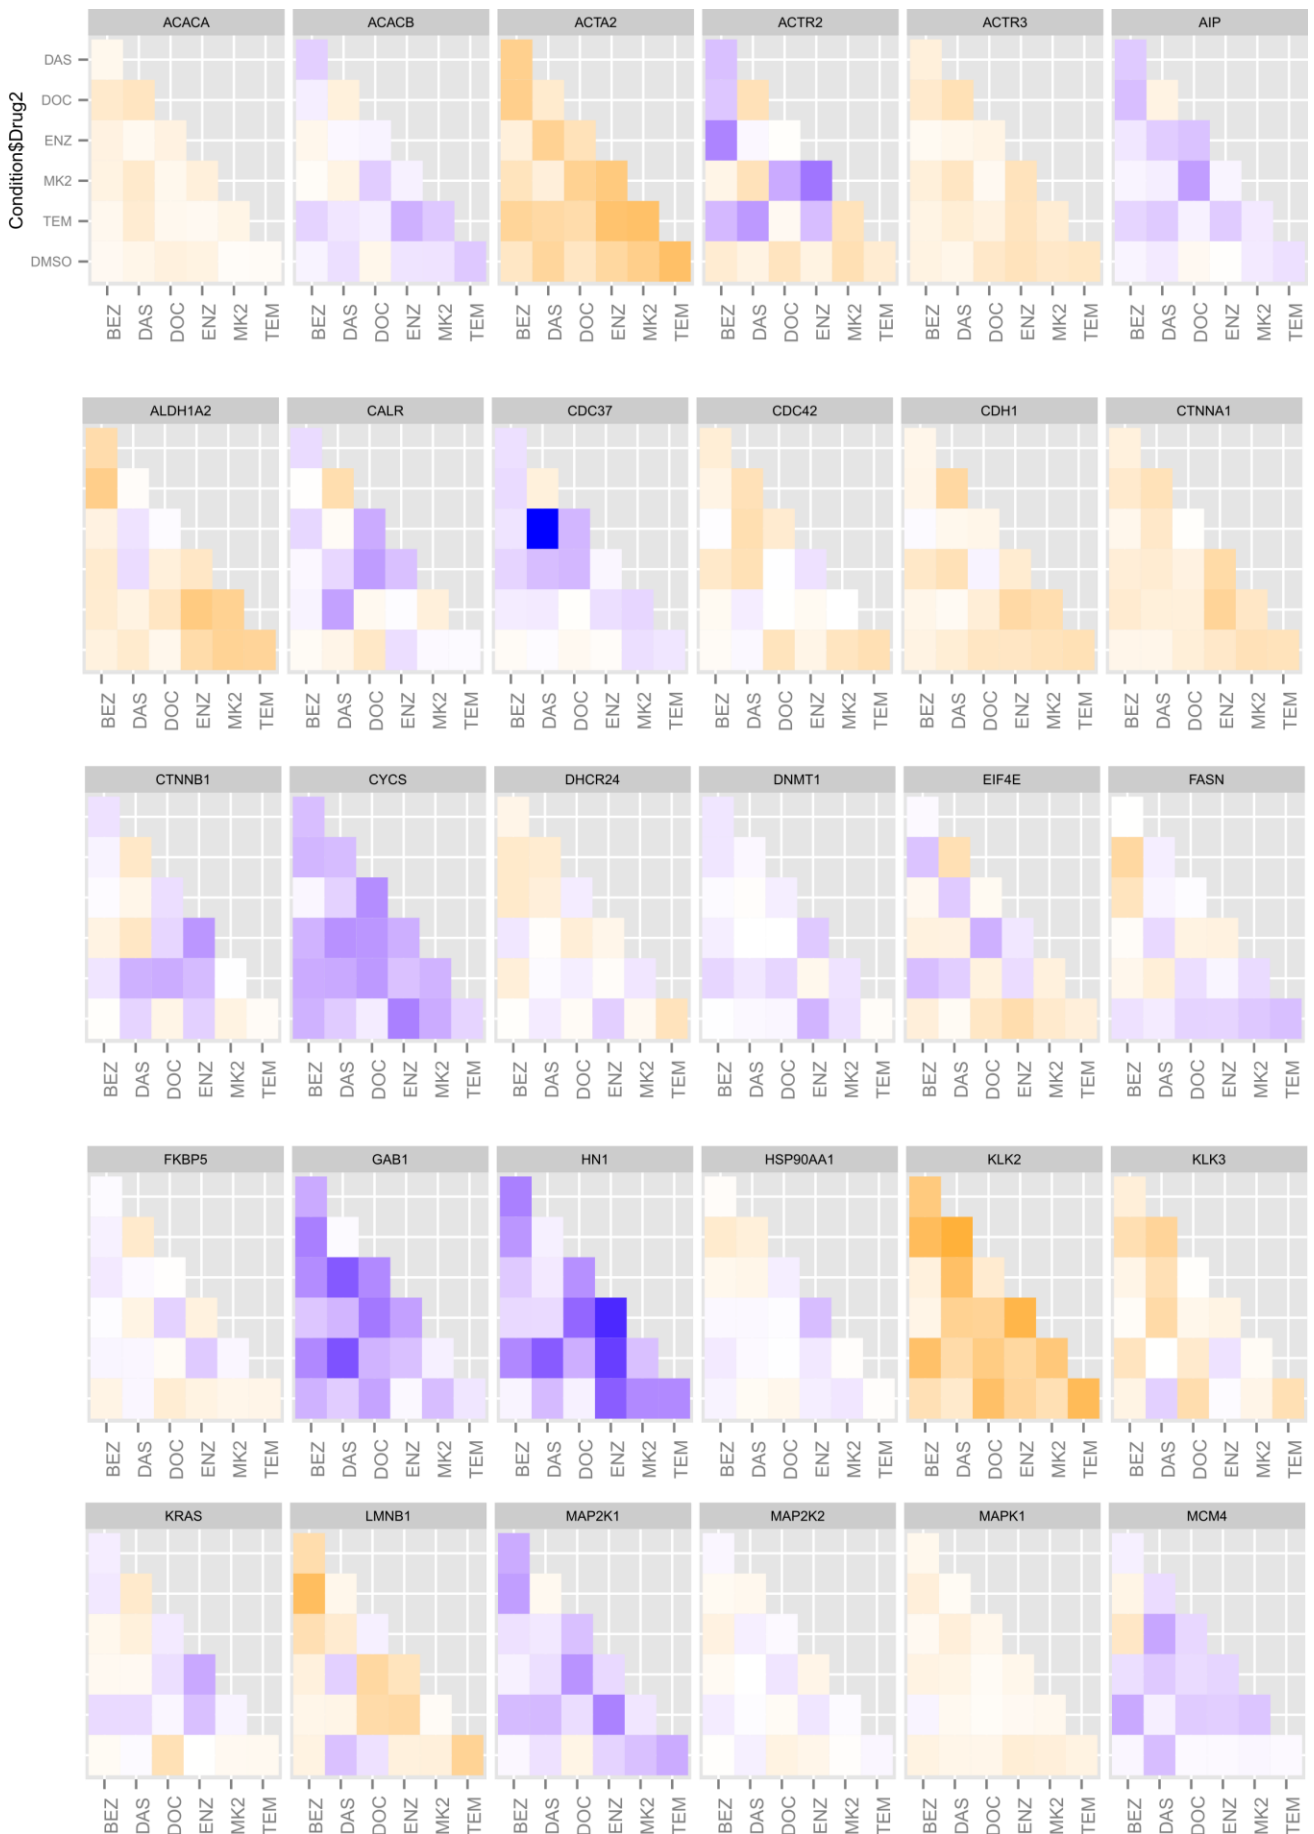

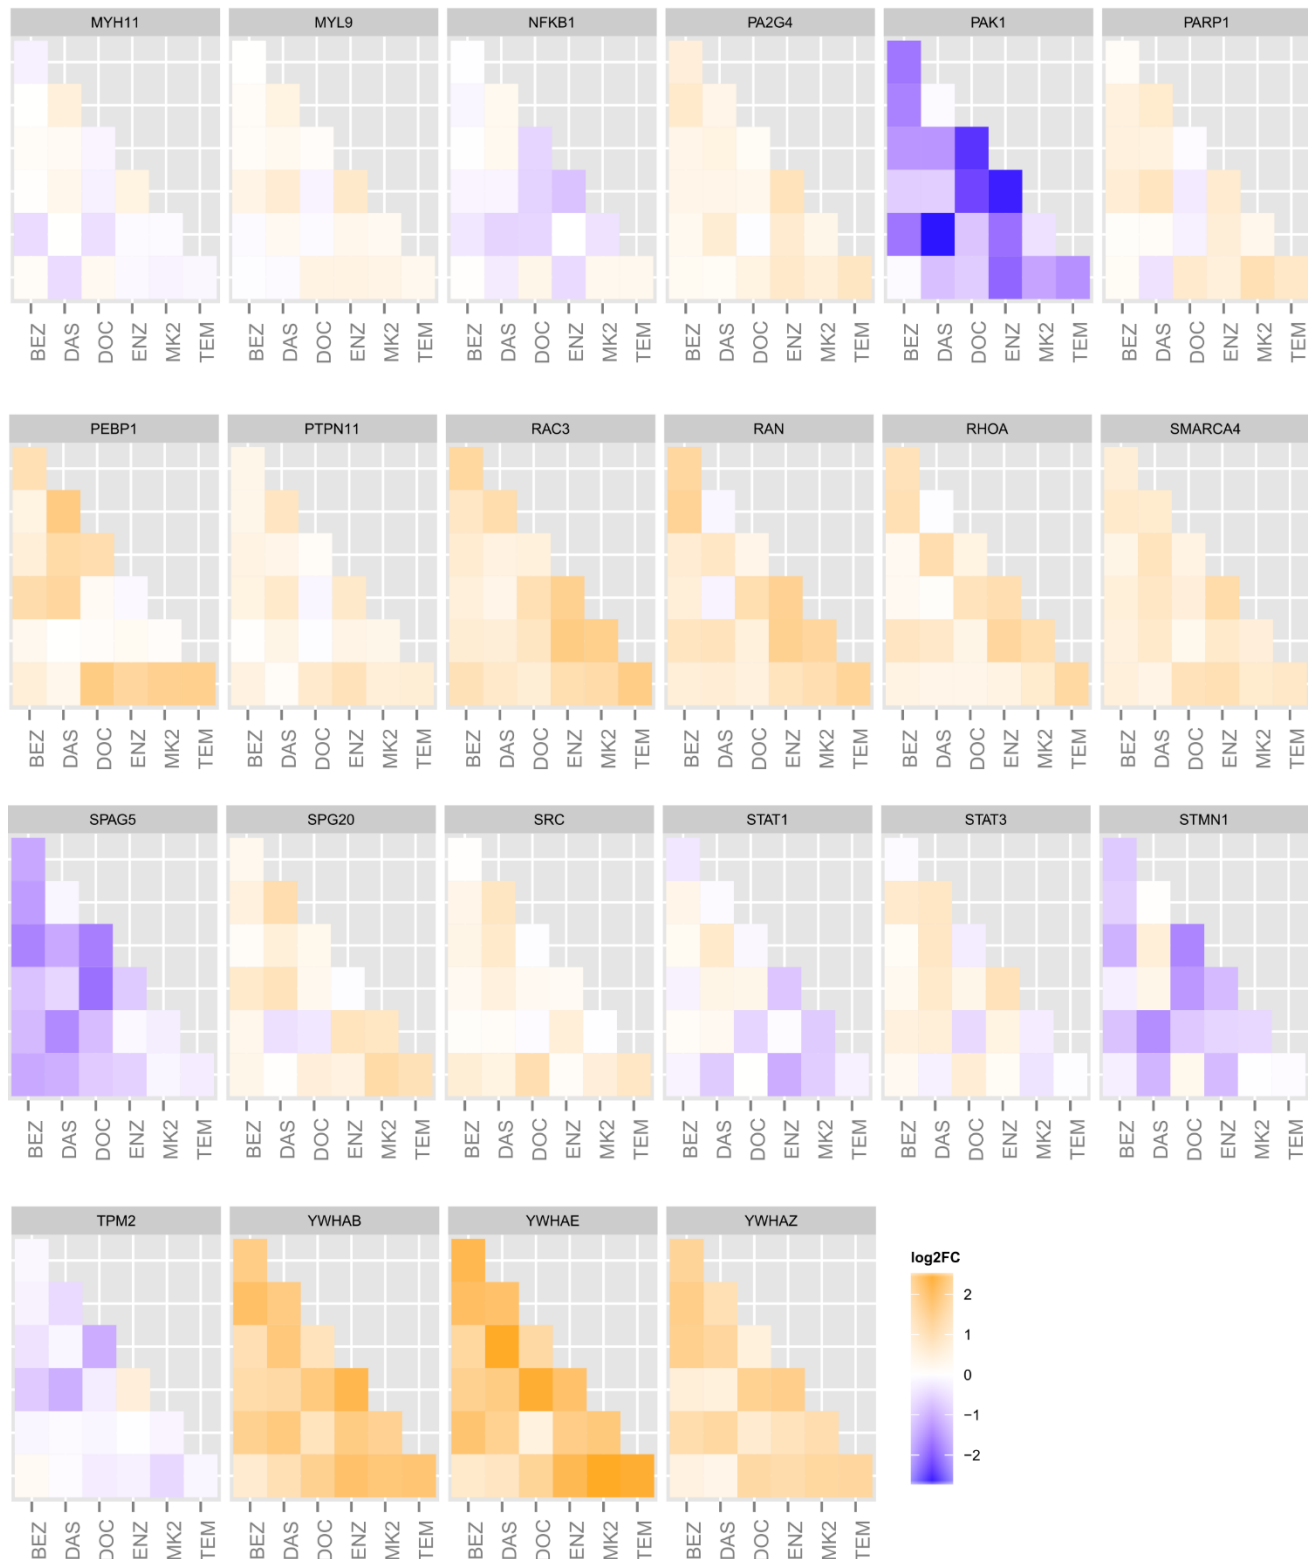

**Supplementary Figure 4: SRM data analysis II.** Protein centric abundance changes per condition relative to untreated. In these triangle plots the first drug is on the x-axis, while the second drug is along the y-axis. Protein names are official gene names.

Supplementary Data: Systems pharmacology using mass spectrometry identifies critical response nodes in prostate cancer by Ehardt HA, Root A, Liu Y, Gauthier N, Sander C, Aebersold R.

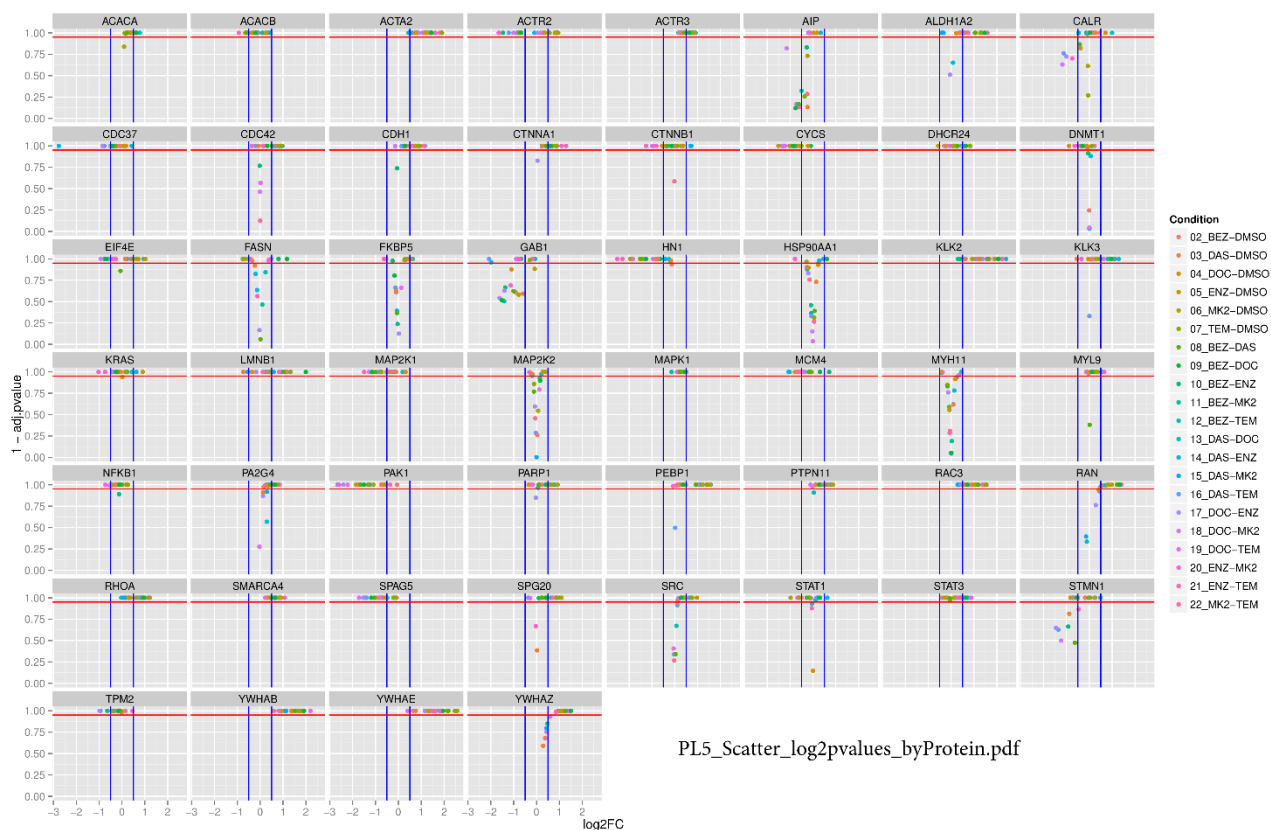

**Supplementary Figure 5: SRM data analysis III.** A protein centric analysis plotting statistical significance as function of ratio between treatment condition to untreated. Protein names are official gene names.

| Cell line | sample name | Drug 1       | Concentration drug1 | Drug 2       | Concentration drug 2 | Time point |
|-----------|-------------|--------------|---------------------|--------------|----------------------|------------|
| Lncap     | 01_DMSO     | DMSO         | NA                  | DMSO         | NA                   | 24hrs      |
| Lncap     | 02_BEZ-DMSO | Bez235       | 500nM               | DMSO         | NA                   | 24hrs      |
| Lncap     | 03_DAS-DMSO | Dasatinib    | 100nM               | DMSO         | NA                   | 24hrs      |
| Lncap     | 04_DOC-DMSO | Docetaxel    | 10nM                | DMSO         | NA                   | 24hrs      |
| Lncap     | 05_ENZ-DMSO | Enzalutamide | 10 $\mu$ M          | DMSO         | NA                   | 24hrs      |
| Lncap     | 06_MK2-DMSO | MK2206       | 1 $\mu$ M           | DMSO         | NA                   | 24hrs      |
| Lncap     | 07_TEM-DMSO | Temsirolimus | 100nM               | DMSO         | NA                   | 24hrs      |
| Lncap     | 08_BEZ-DAS  | Bez235       | 500nM               | Dasatinib    | 100nM                | 24hrs      |
| Lncap     | 09_BEZ-DOC  | Bez235       | 500nM               | Docetaxel    | 10nM                 | 24hrs      |
| Lncap     | 10_BEZ-ENZ  | Bez235       | 500nM               | Enzalutamide | 10 $\mu$ M           | 24hrs      |
| Lncap     | 11_BEZ-MK2  | Bez235       | 500nM               | MK2206       | 1 $\mu$ M            | 24hrs      |
| Lncap     | 12_BEZ-TEM  | Bez235       | 500nM               | Temsirolimus | 100nM                | 24hrs      |
| Lncap     | 13_DAS-DOC  | Dasatinib    | 100nM               | Docetaxel    | 10nM                 | 24hrs      |
| Lncap     | 14_DAS-ENZ  | Dasatinib    | 100nM               | Enzalutamide | 10 $\mu$ M           | 24hrs      |
| Lncap     | 15_DAS-MK2  | Dasatinib    | 100nM               | MK2206       | 1 $\mu$ M            | 24hrs      |
| Lncap     | 16_DAS-TEM  | Dasatinib    | 100nM               | Temsirolimus | 100nM                | 24hrs      |
| Lncap     | 17_DOC-ENZ  | Docetaxel    | 10nM                | Enzalutamide | 10 $\mu$ M           | 24hrs      |
| Lncap     | 18_DOC-MK2  | Docetaxel    | 10nM                | MK2206       | 1 $\mu$ M            | 24hrs      |
| Lncap     | 19_DOC-TEM  | Docetaxel    | 10nM                | Temsirolimus | 100nM                | 24hrs      |
| Lncap     | 20_ENZ-MK2  | Enzalutamide | 10 $\mu$ M          | MK2206       | 1 $\mu$ M            | 24hrs      |
| Lncap     | 21_ENZ-TEM  | Enzalutamide | 10 $\mu$ M          | Temsirolimus | 100nM                | 24hrs      |
| Lncap     | 22_MK2-TEM  | MK2206       | 1 $\mu$ M           | Temsirolimus | 100nM                | 24hrs      |

**Supplementary MM 1: Perturbation matrix.** List of 21 treatment conditions plus vehicle (DMSO) control with drug concentrations.



|                                                                                                                                |                                                                                                                                                                                                                                                                                                                                                                  |
|--------------------------------------------------------------------------------------------------------------------------------|------------------------------------------------------------------------------------------------------------------------------------------------------------------------------------------------------------------------------------------------------------------------------------------------------------------------------------------------------------------|
| <b>Cell Lysis: Reagents</b>                                                                                                    | <b>Procedure</b>                                                                                                                                                                                                                                                                                                                                                 |
| <b>Lysis buffer</b><br>71296   PhosphoSafe™ Extraction Reagent from Millipore                                                  | resuspend cell pellets in 100 µL <b>Lysis buffer</b> (up/down pipetting)<br>sonicate 1.5 mL tubes with 90% intensity 0.8 cycle time (on/off) 20x<br>BCA assay                                                                                                                                                                                                    |
| <b>Reduction and Alkylation: Reagents</b>                                                                                      | <b>Reduction and Alkylation: Procedure</b>                                                                                                                                                                                                                                                                                                                       |
| 0.2 M TCEP in 0.1 M HEPES (stored @ -20°C)<br>Tris(2-carboxyethyl)phosphine hydrochloride<br>MW 286.65 g/mol = 29 mg in 500 µL | Add 4 µL of 0.2 M TCEP <input type="checkbox"/><br>Incubate for 15 min @ 37 °C on a shaker with 1,400 rpm<br>Cool down the sample to room temperature<br>Add 4 µL of 0.4 M iodoacetamide <input type="checkbox"/>                                                                                                                                                |
| 0.4 M iodoacetamide in 0.1 M HEPES<br>MW 184.96 g/mol = 37 mg in 500 µL                                                        | Incubate for 30 min @ 25 °C on a shaker with 1,400 rpm in the dark<br>Spin down 5 min at 12,000 rcf @ 20 °C                                                                                                                                                                                                                                                      |
| <b>Trypsin digest: Reagents</b>                                                                                                | <b>Trypsin digest: Procedure</b>                                                                                                                                                                                                                                                                                                                                 |
| Trypsin, sequencing grade modified<br>V511C, Promega; stored @ -80 °C<br>aliquots of 20 µg (40 µL, 0.5 µg/µL)                  | Add 3 µL 1 M NaOH, Check pH <input type="checkbox"/><br>add trypsin (2 µL or 1:100 dil.)<br>incubate overnight at 37 °C and 250 rpm (floor shaker)                                                                                                                                                                                                               |
| <b>SDS removal: Reagents</b>                                                                                                   | <b>SDS removal: Procedure</b>                                                                                                                                                                                                                                                                                                                                    |
| Detergent Removal Resin, Columns<br>(Thermo Scientific, 877777)<br>SAMPLE VOLUME 25 - 250 µL                                   | remove bottom plug (top only after first spin, resin inside!)<br>centrifuge for 1 min @ 1'500 rcf<br>add 0.4 mL 0.1 M HEPES <input type="checkbox"/> <b>3x</b><br>place in new collection tube, add 25 -250 µL sample (1:1 ratio)<br><b>close lid, vortex, incubate for 10 min at room temp</b><br>centrifuge for 2 min @ 1'500 rcf<br>collect SDS free peptides |
| <b>C18 cleanup: Reagents</b>                                                                                                   | <b>C18 cleanup: Procedure</b>                                                                                                                                                                                                                                                                                                                                    |
| Sep-Pak Vac 1cc (50 mg) WAT036820 tC18 Cartridges                                                                              | Adjust pH to 2-3 using 10 % TFA (approx 8 µL) <input type="checkbox"/>                                                                                                                                                                                                                                                                                           |
| <b>Wash C18</b>                                                                                                                | apply supernatante to C18                                                                                                                                                                                                                                                                                                                                        |
| 5 % acetonitrile                                                                                                               | 1 mL acetonitrile VAC <input type="checkbox"/>                                                                                                                                                                                                                                                                                                                   |
| 0.1 % trifluoroacetic acid (TFA)                                                                                               | 1 mL <b>Wash C18</b> VAC <input type="checkbox"/> <b>3x</b>                                                                                                                                                                                                                                                                                                      |
| <b>Eulte C18</b>                                                                                                               | Apply sample vac OFF <input type="checkbox"/>                                                                                                                                                                                                                                                                                                                    |
| 50 % acetonitrile                                                                                                              | 1 mL <b>Wash C18</b> VAC <input type="checkbox"/> <b>3x</b>                                                                                                                                                                                                                                                                                                      |
| 0.1 % trifluoroacetic acid (TFA)                                                                                               | 0.5 mL <b>Eulte C18</b> syringe                                                                                                                                                                                                                                                                                                                                  |
| <b>HILIC</b>                                                                                                                   | <b>HILIC</b>                                                                                                                                                                                                                                                                                                                                                     |
| Harvard Apparatus GmbH<br>Macro SpinColumns, Hydrophilic Packing Material<br>Qty. of 96; 744305                                | add 400 µL 100 % methanol<br>centrifuge for 2 min @ 1100 rcf<br>discard flowthrough<br>add 400 µL <b>dH<sub>2</sub>O</b>                                                                                                                                                                                                                                         |
| <b>Conditioning Buffer pH 4</b>                                                                                                | centrifuge for 1 min @ 1100 rcf <input type="checkbox"/> <b>3x</b><br>discard flowthrough                                                                                                                                                                                                                                                                        |
| 0.2 M monosodium acetate,<br>0.3 M sodium acetate                                                                              | add 600 µL <b>Conditioning Buffer pH 4</b><br>centrifuge for 30 sec. @ 1100 rcf                                                                                                                                                                                                                                                                                  |
| <b>Loading Buffer pH 6</b>                                                                                                     | <b>let equilibrate for 1 hour</b>                                                                                                                                                                                                                                                                                                                                |
| 25 mM ammonium formate<br>80 % acetonitrile                                                                                    | centrifuge for 1 min @ 1100 rcf<br>add 400 µL <b>Loading Buffer pH 6</b><br>centrifuge for 1 min @ 1100 rcf <input type="checkbox"/> <b>3x</b><br>discard flowthrough                                                                                                                                                                                            |
| <b>Elute HILIC</b>                                                                                                             | resuspend dried peptides in 400 µL <b>Loading Buffer pH 6</b><br>sonicate sample, 5 min<br>centrifuge for 1 min @ 1100 rcf<br>discard flowthrough, add HILIC columns to a new 2 mL tube<br>add 400 µL <b>Elute HILIC</b><br>centrifuge for 2 min @ 1100 rcf<br>dry under vaccum 45 °C                                                                            |

**Supplementary MM 2: Peptide generation protocol.** Step-by-step protocol, including reagents used, to generate purified peptides free of neutral lipids.
